# Supplementary material for: Global Transcriptome Profile of the Developmental Principles of in Vitro iPSC-to-Motor Neuron Differentiation
Source: Research Square preprint supplement (doi:10.21203/rs.3.rs-108453/v1), 2020-11-19
Supplement: Supplementary file 1 [file 35dfbf10d18e60b11585181c.xlsx]

## Sheet: D0__D7__gene__significant
Gene name	baseMean	log2FoldChange	lfcSE	stat	pvalue	padj
MEIS2	3730.77	-8.1574	0.472263	-17.273	7.51169e-67	1.4472e-62
UNC13A	496.672	4.3807	0.264267	16.5768	1.02597e-61	9.88319e-58
MDGA1	542.908	-8.05637	0.507515	-15.8742	9.56968e-57	6.14565e-53
ASXL3	782.493	-7.56853	0.511713	-14.7906	1.68495e-49	8.11555e-46
SPOCK3	925.465	6.22257	0.431811	14.4104	4.45071e-47	1.71495e-43
PLXNA2	3383.8	-6.84937	0.488533	-14.0203	1.17171e-44	3.76237e-41
SEMA3C	835.578	-7.02656	0.509762	-13.784	3.18105e-43	8.75515e-40
DPYSL5	1743.68	-4.92162	0.357639	-13.7614	4.34979e-43	1.04754e-39
PHC1	458.956	2.92159	0.212834	13.7271	6.9892e-43	1.49615e-39
LINC01933	2486.38	-7.47543	0.556303	-13.4377	3.63616e-41	7.00542e-38
NRCAM	2017.69	-5.11823	0.383187	-13.357	1.07824e-40	1.88849e-37
GREB1L	1327.46	-4.6472	0.360684	-12.8844	5.50985e-38	8.84606e-35
ZBTB16	959.203	-9.95451	0.777737	-12.7993	1.65371e-37	2.4508e-34
SEPHS1	587.836	3.23025	0.252951	12.7703	2.40324e-37	3.3072e-34
GRID2	2752.14	5.40794	0.42588	12.6983	6.04522e-37	7.76448e-34
DNAH1	228.883	-4.23323	0.339834	-12.4567	1.28521e-35	1.54755e-32
ANOS1	692.149	3.67539	0.296168	12.4098	2.31196e-35	2.62013e-32
BRINP1	268.734	4.80332	0.387396	12.399	2.64643e-35	2.83256e-32
TSHZ1	1435.67	-8.83677	0.72328	-12.2176	2.50277e-34	2.53781e-31
PRTG	9375.96	-6.3233	0.524058	-12.066	1.5967e-33	1.5381e-30
RARB	1699.85	-5.38433	0.446768	-12.0517	1.89884e-33	1.74205e-30
RBM47	325.191	5.72921	0.489392	11.7068	1.17638e-31	1.03019e-28
SKAP2	1304.34	-4.41574	0.378615	-11.6629	1.97282e-31	1.65254e-28
AASS	1579.23	2.45897	0.211701	11.6153	3.44636e-31	2.76657e-28
NCKAP5	1816.76	-3.98214	0.345052	-11.5407	8.22554e-31	6.33893e-28
CACNA2D1	501.797	5.01307	0.442077	11.3398	8.3318e-30	6.17386e-27
LINC01414	3245.03	-7.50766	0.663355	-11.3177	1.07226e-29	7.6512e-27
PRMT8	618.593	-4.18021	0.377212	-11.0819	1.53638e-28	1.05714e-25
LOC107983974	1233.99	-7.48259	0.680018	-11.0035	3.67509e-28	2.44153e-25
CADM1	4053.19	-3.61045	0.328821	-10.98	4.76994e-28	3.06325e-25
FBXO25	373.724	3.06478	0.281011	10.9063	1.07576e-27	6.68568e-25
PAX6	919.776	-7.22278	0.666514	-10.8367	2.30753e-27	1.38927e-24
LYST	268.542	-4.35214	0.402284	-10.8186	2.81112e-27	1.64118e-24
LOC105377567	1106.67	-5.33029	0.494049	-10.789	3.88e-27	2.19859e-24
BAHCC1	284.354	-7.54712	0.703647	-10.7257	7.7086e-27	4.24326e-24
VASH2	692.244	3.53961	0.331984	10.662	1.53268e-26	8.20242e-24
CATSPERG	152.485	-4.39986	0.413048	-10.6522	1.70344e-26	8.86987e-24
NDNF	611.849	-5.3694	0.50673	-10.5962	3.10435e-26	1.57391e-23
BOC	709.183	-4.81151	0.454749	-10.5806	3.66668e-26	1.81134e-23
SOX5	2152.44	-4.04855	0.384356	-10.5333	6.064e-26	2.92073e-23
ZEB2	1566.28	-5.87401	0.559198	-10.5043	8.2496e-26	3.87651e-23
RAI1	671.621	-3.71952	0.354788	-10.4838	1.02558e-25	4.70449e-23
PRSS23	670.508	-4.62863	0.442187	-10.4676	1.21733e-25	5.45419e-23
GRHL2	190.511	5.26575	0.504419	10.4393	1.64096e-25	7.18518e-23
IGFBP5	2702.1	-5.4368	0.522554	-10.4043	2.37048e-25	1.01488e-22
TDGF1	518.989	13.7496	1.32259	10.3959	2.58806e-25	1.08395e-22
LINC01470	715.03	-6.88096	0.666929	-10.3174	5.88012e-25	2.41035e-22
MIR124-2HG	990.671	-6.17337	0.599893	-10.2908	7.75352e-25	3.11207e-22
ACKR3	556.909	-5.85811	0.569376	-10.2886	7.92831e-25	3.11728e-22
JPH1	171.852	3.35383	0.327483	10.2412	1.29555e-24	4.992e-22
DCLK2	424.979	-4.65348	0.455496	-10.2163	1.67641e-24	6.33289e-22
NLN	676.48	2.89595	0.286082	10.1228	4.37634e-24	1.62144e-21
MEIS1	1450.27	-8.20864	0.811644	-10.1136	4.80828e-24	1.74786e-21
BAALC	524.042	-6.02739	0.596898	-10.0979	5.64658e-24	2.01458e-21
LRP2	402.699	-6.31162	0.625463	-10.0911	6.04744e-24	2.11836e-21
ZNF516	699.441	-3.51383	0.348371	-10.0865	6.342e-24	2.18187e-21
NCAM1	3825.9	-3.66905	0.364089	-10.0773	6.95893e-24	2.35212e-21
GLYCTK	173.896	-4.52112	0.450712	-10.0311	1.11305e-23	3.69724e-21
LOC105370982	810.687	-6.29283	0.627901	-10.022	1.21999e-23	3.98377e-21
FNDC5	498.003	-5.08544	0.510212	-9.9673	2.11904e-23	6.80423e-21
TNFRSF19	200.439	-4.84603	0.488238	-9.92556	3.22298e-23	1.01793e-20
ITPR2	581.249	3.69982	0.373809	9.89762	4.26309e-23	1.32472e-20
TERF1	738.657	3.23822	0.330453	9.79934	1.13326e-22	3.46561e-20
CRABP2	961.668	-5.00346	0.511309	-9.78559	1.29834e-22	3.90839e-20
SEMA6A	1269.53	2.96268	0.303358	9.76626	1.57142e-22	4.6577e-20
PCDH19	442.37	-4.34281	0.445106	-9.7568	1.72517e-22	5.03593e-20
MAN1A1	429.082	-3.41853	0.350575	-9.75122	1.82262e-22	5.24099e-20
FBLN7	202.434	-6.09899	0.627236	-9.7236	2.39162e-22	6.77602e-20
PHC2	601.931	-3.32829	0.344745	-9.65438	4.71018e-22	1.31517e-19
HOXB3	2718.57	-12.2876	1.27424	-9.64308	5.2584e-22	1.44726e-19
CPE	479.649	-3.21512	0.335862	-9.57272	1.04125e-21	2.82545e-19
SNHG14	6148.84	2.48966	0.260321	9.56381	1.13499e-21	3.03705e-19
SLIT1	1207.78	-5.44783	0.570268	-9.5531	1.25867e-21	3.32185e-19
BCL11A	235.99	6.55096	0.688739	9.51153	1.87875e-21	4.89136e-19
NBPF8	142.044	-2.94129	0.310914	-9.46014	3.07544e-21	7.90019e-19
HOTAIRM1	690.262	-11.7513	1.24329	-9.45177	3.33164e-21	8.4457e-19
PYGO1	303.591	-2.89084	0.306472	-9.43265	3.99847e-21	1.00045e-18
PCBP4	909.132	-4.27916	0.454839	-9.40807	5.05313e-21	1.24812e-18
FLJ12825	2002.78	-12.379	1.31636	-9.40398	5.25374e-21	1.28125e-18
CBL	485.604	1.78715	0.19079	9.36711	7.4547e-21	1.79528e-18
EPHB3	252.511	-5.41606	0.578586	-9.36086	7.90895e-21	1.88116e-18
PTCHD1	110.532	4.73906	0.50654	9.35574	8.30152e-21	1.95045e-18
PKNOX2	1281.73	-4.29877	0.460595	-9.33308	1.02839e-20	2.38636e-18
PIK3C2B	682.316	-2.7437	0.294014	-9.33184	1.04045e-20	2.38636e-18
RYR2	708.584	4.07053	0.436908	9.31668	1.20034e-20	2.72067e-18
CNTFR	198.875	-6.67121	0.718428	-9.28585	1.60422e-20	3.59383e-18
NELL1	2367.43	-6.00445	0.648385	-9.26063	2.0322e-20	4.50028e-18
CERCAM	323.928	-5.18906	0.56158	-9.24012	2.46227e-20	5.39069e-18
HOXB1	703.62	-11.5545	1.25128	-9.23414	2.60365e-20	5.63616e-18
GABRB3	1302.85	3.08537	0.334955	9.2113	3.22202e-20	6.89728e-18
DNMT3B	1035.27	3.11125	0.340003	9.15063	5.66029e-20	1.19836e-17
FZD5	169.12	4.61602	0.506939	9.10567	8.57341e-20	1.79538e-17
CNKSR3	553.579	-4.18432	0.459788	-9.10055	8.98782e-20	1.86193e-17
ST8SIA1	296.646	-3.40552	0.374374	-9.09658	9.32201e-20	1.91062e-17
PPP1R14C	365.922	-7.98577	0.878891	-9.08618	1.02578e-19	2.08029e-17
UGP2	415.565	2.41894	0.266615	9.07281	1.15985e-19	2.32768e-17
HOXA3	888.077	-11.0776	1.22297	-9.05795	1.32926e-19	2.64016e-17
LINC01798	140.107	-5.25668	0.581865	-9.03418	1.65232e-19	3.24832e-17
ZBTB44	550.639	2.26681	0.253229	8.95161	3.50336e-19	6.81775e-17
NKD1	163.28	-2.96532	0.333239	-8.89847	5.66204e-19	1.09085e-16
LIMCH1	857.094	-3.63665	0.408919	-8.89333	5.93049e-19	1.13126e-16
LOC105377861	80.592	6.78329	0.767987	8.83255	1.02312e-18	1.91882e-16
L1TD1	1121.49	5.61938	0.636233	8.83226	1.02584e-18	1.91882e-16
TSPAN18	960.026	-3.32289	0.37692	-8.81592	1.18707e-18	2.19904e-16
JARID2	1717.03	3.3645	0.383983	8.76212	1.91614e-18	3.51585e-16
BCORL1	121.051	-3.75831	0.430534	-8.7294	2.56017e-18	4.65323e-16
FZD6	446.29	-2.159	0.247889	-8.70954	3.051e-18	5.49351e-16
NEK3	198.326	-2.0892	0.240135	-8.70011	3.31574e-18	5.91492e-16
ADAM12	373.695	-3.51874	0.404498	-8.69904	3.34697e-18	5.91585e-16
DACH1	2886	-5.0747	0.584392	-8.68372	3.83035e-18	6.70868e-16
HOXB9	1694.61	-11.499	1.32508	-8.67797	4.02903e-18	6.99308e-16
KCNH7	615.692	-5.19961	0.599495	-8.67332	4.19702e-18	7.21962e-16
NRIP1	2071.41	-2.3995	0.276753	-8.67018	4.31429e-18	7.35568e-16
PLCE1	177.205	-3.97906	0.461979	-8.61307	7.11273e-18	1.20205e-15
KCTD8	760.983	3.75524	0.436203	8.60892	7.37549e-18	1.23562e-15
HOXD4	1107.42	-11.0679	1.28707	-8.5993	8.02035e-18	1.33207e-15
CDH10	376.93	-4.94227	0.575344	-8.5901	8.68928e-18	1.43084e-15
FGF9	111.74	-3.93043	0.457663	-8.58805	8.84612e-18	1.44432e-15
SRGAP3	1918.73	-3.6057	0.420166	-8.58161	9.35578e-18	1.51469e-15
VAT1L	318.503	2.79006	0.325267	8.57776	9.67383e-18	1.55313e-15
MPP2	277.054	-2.57601	0.300453	-8.57378	1.00146e-17	1.59456e-15
ESRP2	60.0968	4.17553	0.487459	8.5659	1.0723e-17	1.69336e-15
SMAD7	93.8295	4.92314	0.576418	8.54092	1.33153e-17	2.08563e-15
CDH3	160.894	4.36687	0.51335	8.50661	1.79085e-17	2.78246e-15
CCBE1	286.161	5.24048	0.616236	8.50402	1.8313e-17	2.82255e-15
HGSNAT	286.436	-2.56996	0.303437	-8.4695	2.46452e-17	3.76838e-15
CYP2S1	174.959	5.20084	0.61551	8.44965	2.92172e-17	4.43228e-15
PROX1	613.595	-5.41013	0.640737	-8.44361	3.07691e-17	4.63122e-15
SLC9A7	345.721	1.9393	0.23046	8.41493	3.93122e-17	5.84049e-15
VSNL1	122.082	3.09998	0.368403	8.41464	3.94095e-17	5.84049e-15
HOXA1	239.841	-7.0628	0.84151	-8.39301	4.73861e-17	6.96901e-15
PLEKHG1	797.576	-4.30955	0.513542	-8.39182	4.78659e-17	6.98624e-15
KLHDC8A	750.946	-5.39115	0.644425	-8.36583	5.96916e-17	8.64676e-15
TMEM176B	473.941	-6.9258	0.829717	-8.34718	6.99118e-17	1.00516e-14
NALCN-AS1	847.237	-6.11636	0.734001	-8.3329	7.88829e-17	1.11858e-14
PMEPA1	139.396	5.89503	0.70745	8.33279	7.89616e-17	1.11858e-14
PLAGL1	381.577	-5.04853	0.606385	-8.32561	8.38949e-17	1.1798e-14
DHX32	147.145	-2.88298	0.346837	-8.3122	9.39413e-17	1.3115e-14
CLVS1	1528.17	-5.50776	0.664329	-8.29071	1.12577e-16	1.56037e-14
JADE1	597.354	2.10085	0.253621	8.28341	1.19692e-16	1.64714e-14
HOXD3	495.233	-10.006	1.21146	-8.25946	1.46329e-16	1.99941e-14
ANTXR2	536.53	-3.22863	0.392488	-8.22607	1.93449e-16	2.62464e-14
POU3F2	437.095	-8.57365	1.04361	-8.21536	2.11524e-16	2.84981e-14
SCD5	236.072	-2.86733	0.350824	-8.17311	3.00543e-16	4.02101e-14
NEK5	149.624	-3.36346	0.413348	-8.13713	4.0476e-16	5.37801e-14
NCALD	866.576	-3.87143	0.476437	-8.1258	4.44429e-16	5.86464e-14
SCNN1A	91.1866	10.2661	1.26392	8.12243	4.56946e-16	5.98879e-14
ZEB1	1336.52	-3.57211	0.439998	-8.11846	4.72124e-16	6.1459e-14
ZADH2	452.476	-3.27182	0.403067	-8.1173	4.76659e-16	6.1633e-14
LRAT	86.7037	7.33094	0.906249	8.08933	5.99959e-16	7.70587e-14
KIAA1755	140.622	-11.0139	1.36393	-8.07518	6.73783e-16	8.59675e-14
LOC145845	183.357	-8.55214	1.06223	-8.05113	8.20344e-16	1.03979e-13
SPSB4	2222.2	-3.54496	0.440522	-8.04718	8.47209e-16	1.06682e-13
VAX2	89.3234	-8.0625	1.00413	-8.02931	9.80251e-16	1.22633e-13
NFIB	378.101	3.36425	0.419904	8.01195	1.12908e-15	1.4034e-13
TTC9	175.297	2.88099	0.359946	8.00393	1.20505e-15	1.48824e-13
ATP9A	1065.92	-2.10709	0.263523	-7.99586	1.28669e-15	1.57894e-13
PTCHD4	900.15	-3.80562	0.476276	-7.99038	1.34527e-15	1.63092e-13
ASIC2	473.659	3.28474	0.41109	7.99031	1.34598e-15	1.63092e-13
CDH2	3449.95	-2.41477	0.304297	-7.93558	2.09515e-15	2.52282e-13
PCDH17	916.023	-5.47624	0.69134	-7.92119	2.35247e-15	2.81507e-13
ACOXL	285.204	4.69838	0.593426	7.91739	2.42546e-15	2.8845e-13
LEMD3	354.367	1.54586	0.195931	7.88983	3.02599e-15	3.57661e-13
LEF1	182.867	-6.10124	0.774226	-7.88044	3.2623e-15	3.8324e-13
SPON1	947.494	-4.51502	0.574109	-7.8644	3.70869e-15	4.3304e-13
ATP6V1B1	76.3092	-10.4539	1.33074	-7.85576	3.97369e-15	4.61188e-13
GPR176	684.847	3.50723	0.448243	7.82439	5.10132e-15	5.88515e-13
SKAP1	214.01	-4.63522	0.593106	-7.81517	5.48896e-15	6.27787e-13
METTL24	142.854	-5.79503	0.74155	-7.81476	5.5069e-15	6.27787e-13
LRRC7	517.485	-4.26765	0.546515	-7.80884	5.77155e-15	6.54087e-13
SOX1-OT	83.8895	-9.75577	1.25065	-7.80057	6.16264e-15	6.91859e-13
SDK2	1291.07	-3.41976	0.438415	-7.80029	6.17667e-15	6.91859e-13
MAP6	914.68	-4.22607	0.542293	-7.79296	6.54553e-15	7.28938e-13
CALN1	530.077	3.1793	0.408484	7.78318	7.07232e-15	7.83076e-13
CADM2	1170.06	3.43907	0.442358	7.77441	7.57997e-15	8.3449e-13
LINC00673	429.807	-5.69761	0.734115	-7.76119	8.41345e-15	9.20148e-13
TAGLN3	361.58	-3.50813	0.452044	-7.76059	8.45355e-15	9.20148e-13
MEOX1	107.358	-10.0498	1.29807	-7.74213	9.77621e-15	1.05814e-12
TDRP	289.074	2.98927	0.386191	7.74039	9.91106e-15	1.06674e-12
ADAMTS9-AS2	102.791	-4.88413	0.633141	-7.71413	1.21813e-14	1.3038e-12
TIAM2	414.736	-3.35771	0.435488	-7.71023	1.2559e-14	1.3368e-12
PDE10A	744.111	-3.13268	0.406972	-7.69753	1.38718e-14	1.46843e-12
LOC105377899	128.779	-4.8427	0.631384	-7.66998	1.72027e-14	1.81108e-12
KDM6B	288.499	-3.77302	0.49209	-7.66734	1.75598e-14	1.83863e-12
LOC105370482	60.8744	5.73979	0.749291	7.6603	1.85506e-14	1.93187e-12
DPF3	130.263	-4.99044	0.65177	-7.65675	1.90701e-14	1.97529e-12
CDH24	392.288	-3.27563	0.428286	-7.64824	2.03754e-14	2.08834e-12
NTRK2	672.031	-8.55911	1.1191	-7.64822	2.03783e-14	2.08834e-12
USO1	524.859	1.81915	0.238379	7.63134	2.3233e-14	2.36829e-12
IRX3	128.972	-5.79766	0.760094	-7.62755	2.39262e-14	2.42612e-12
UNC80	400.88	-2.96082	0.388974	-7.61187	2.7015e-14	2.72498e-12
IER5L	97.7442	-5.34091	0.70269	-7.60067	2.94609e-14	2.95622e-12
CELSR2	1442.59	-3.22832	0.424851	-7.59871	2.99106e-14	2.98579e-12
LNPEP	408.219	-2.44806	0.322855	-7.58253	3.38889e-14	3.36548e-12
RBM20	357.175	-4.42961	0.584736	-7.5754	3.58025e-14	3.53728e-12
BCOR	526.047	2.3021	0.303934	7.57432	3.61002e-14	3.5485e-12
LARP1	1461.95	1.29202	0.170609	7.573	3.64695e-14	3.56661e-12
TSHZ2	1669.06	-4.46987	0.590516	-7.56942	3.74886e-14	3.64775e-12
COLEC12	237.392	-3.80243	0.502484	-7.56726	3.81165e-14	3.69021e-12
FAM189A2	94.989	4.82181	0.637491	7.56373	3.91668e-14	3.77294e-12
CCDC102B	322.124	-2.68715	0.355468	-7.55946	4.04733e-14	3.8794e-12
DTX4	1261.62	-3.2617	0.43192	-7.55163	4.29848e-14	4.09973e-12
KCNIP4	5219.36	-3.86301	0.51231	-7.54037	4.68626e-14	4.44756e-12
SHANK2	981.568	3.19911	0.425131	7.52501	5.27173e-14	4.97869e-12
ROR1	1930.86	2.72866	0.362837	7.52035	5.46294e-14	5.1341e-12
SETBP1	3786.86	-2.83668	0.378778	-7.48904	6.93795e-14	6.48867e-12
ELOVL7	68.8112	3.05428	0.408153	7.48318	7.25466e-14	6.75209e-12
LOC105372310	766.071	2.2709	0.303644	7.47882	7.49907e-14	6.94602e-12
ARHGEF28	97.3958	-4.09388	0.547459	-7.47796	7.54856e-14	6.9584e-12
PHYHIPL	336.669	-4.06247	0.544243	-7.46446	8.36442e-14	7.67376e-12
GLRB	108.732	-3.4521	0.46291	-7.4574	8.8247e-14	8.05766e-12
MYO16	858.791	-4.69916	0.6302	-7.45662	8.87723e-14	8.06739e-12
DOK6	536.743	-3.11265	0.417549	-7.45457	9.01609e-14	8.15512e-12
TXNIP	322.15	-3.03167	0.406835	-7.45183	9.20518e-14	8.28725e-12
FOXO1	529.392	2.74479	0.368445	7.44966	9.35833e-14	8.38593e-12
METRN	190.096	-3.65821	0.491194	-7.44759	9.50605e-14	8.47887e-12
WLS	60.1278	-5.70005	0.765453	-7.44664	9.57479e-14	8.50083e-12
SH3GL3	122.415	4.06871	0.546428	7.44601	9.62057e-14	8.50229e-12
ATOH8	75.2006	-6.3833	0.85831	-7.43706	1.0295e-13	9.05676e-12
C6orf132	67.4488	4.08111	0.549582	7.42585	1.1206e-13	9.8134e-12
EFEMP1	100.359	-3.94304	0.531313	-7.42131	1.15968e-13	1.01097e-11
ENOX1	638.178	-2.9343	0.395732	-7.41486	1.21752e-13	1.05661e-11
GFRA1	2845.67	-3.68693	0.49729	-7.41403	1.22514e-13	1.05846e-11
TMEM200A	125.425	3.00901	0.406194	7.40782	1.28396e-13	1.10432e-11
ZFHX3	1430.63	-3.53479	0.477311	-7.40564	1.30517e-13	1.11757e-11
KIF26B	181.469	-4.72284	0.638086	-7.40157	1.34584e-13	1.1473e-11
TBC1D9	388.063	-2.29029	0.309563	-7.39847	1.37766e-13	1.16925e-11
AFF3	1358.33	-3.5695	0.482615	-7.39617	1.4017e-13	1.18444e-11
SCN3A	467.951	-5.56282	0.752248	-7.39492	1.41491e-13	1.19038e-11
SNCAIP	894.963	-3.91649	0.530546	-7.382	1.55927e-13	1.30612e-11
TMCC1-AS1	77.0694	-2.95318	0.401004	-7.36448	1.77833e-13	1.48317e-11
RELN	2407.27	-8.47353	1.15086	-7.3628	1.80095e-13	1.48354e-11
FAM222A	48.4844	-5.10028	0.692712	-7.36278	1.80121e-13	1.48354e-11
MACROH2A2	447.076	-2.20283	0.299187	-7.36273	1.80186e-13	1.48354e-11
CKB	1050.18	-2.47098	0.335944	-7.35533	1.90461e-13	1.56146e-11
IDH2	282.788	-2.86069	0.389579	-7.34302	2.08833e-13	1.70126e-11
RIN2	563.906	-3.62145	0.493202	-7.34273	2.0928e-13	1.70126e-11
MGAT4C	274.357	3.61614	0.493223	7.33166	2.27316e-13	1.84012e-11
PTCH1	938.003	-3.51764	0.480167	-7.32587	2.3735e-13	1.9133e-11
ELAVL4	1823.74	-3.35962	0.459043	-7.31874	2.50309e-13	2.00935e-11
ME3	682.432	-3.29151	0.450662	-7.30373	2.79904e-13	2.23531e-11
NRP1	969.219	-4.11711	0.563732	-7.30331	2.80777e-13	2.23531e-11
HOXB8	413.754	-9.37532	1.28528	-7.2944	2.99995e-13	2.37848e-11
NEUROG2	169.021	-9.75995	1.33886	-7.28976	3.10514e-13	2.45179e-11
RNF165	932.126	-2.66752	0.366067	-7.28699	3.16967e-13	2.49253e-11
BICDL1	219.658	2.20616	0.30347	7.2698	3.6002e-13	2.81957e-11
LOC105369147	119.855	-4.43153	0.610865	-7.25451	4.03112e-13	3.14428e-11
LOC101928278	332.435	-4.17943	0.576815	-7.2457	4.30215e-13	3.34214e-11
EOGT	110.943	2.8779	0.397542	7.23923	4.51232e-13	3.49134e-11
CLSTN2	1438.52	-3.05127	0.421694	-7.23574	4.63009e-13	3.56813e-11
WNT2B	72.1056	-3.74145	0.517422	-7.23095	4.79642e-13	3.68159e-11
LARGE2	50.4217	6.3028	0.872225	7.22611	4.97022e-13	3.79985e-11
CCDC92	207.381	-3.78782	0.524361	-7.22369	5.05968e-13	3.85296e-11
IGSF21	144.691	4.50002	0.623869	7.21309	5.46958e-13	4.1487e-11
SPATS2L	567.854	2.99988	0.41658	7.20119	5.96876e-13	4.50958e-11
LINC00922	137.748	3.45998	0.480606	7.1992	6.05687e-13	4.55827e-11
TUBA4A	41.3122	4.85006	0.675151	7.18367	6.78645e-13	5.08746e-11
NR2F1	429.884	-9.11114	1.27432	-7.14983	8.68882e-13	6.48832e-11
MYO1D	351.744	2.11337	0.295937	7.14129	9.24621e-13	6.87789e-11
ARFGEF3	328.565	2.4272	0.340193	7.13476	9.6955e-13	7.18436e-11
NLGN4X	1529.64	2.40798	0.338035	7.12346	1.05248e-12	7.76902e-11
CACNG8	62.9782	3.68477	0.517372	7.12209	1.06306e-12	7.81713e-11
OAF	67.4643	-6.73701	0.94643	-7.11834	1.09236e-12	8.00202e-11
LDLRAD4	233.988	3.06018	0.430443	7.10939	1.16558e-12	8.50611e-11
TMEM176A	322.457	-5.23724	0.737029	-7.10587	1.19566e-12	8.69265e-11
NPPC	92.3496	-6.21647	0.875178	-7.1031	1.21992e-12	8.83572e-11
ZNF804A	689.696	-4.75575	0.670104	-7.09703	1.27471e-12	9.19793e-11
LOC105378236	148.212	-8.07837	1.14124	-7.07861	1.45602e-12	1.04671e-10
CAMK2N1	627.282	-4.49377	0.635158	-7.07505	1.49392e-12	1.06995e-10
LOC107985177	75.2981	-6.2336	0.881272	-7.07342	1.51166e-12	1.07865e-10
FAM13C	197.522	-3.93205	0.556318	-7.06799	1.57189e-12	1.11749e-10
FBN1	414.428	-2.63607	0.373064	-7.06602	1.59443e-12	1.12935e-10
LAMP5	282.152	-4.8426	0.685795	-7.06129	1.64961e-12	1.16416e-10
SPRY4	412.482	5.02477	0.713132	7.04606	1.84052e-12	1.29414e-10
LOC105379082	165.634	-7.41444	1.05582	-7.02247	2.17977e-12	1.52711e-10
ILDR2	148.736	-4.19158	0.597507	-7.01511	2.29772e-12	1.60391e-10
SPINT1	53.7952	5.35867	0.764087	7.01317	2.32982e-12	1.62045e-10
HMGCLL1	154.735	-5.19583	0.74347	-6.98862	2.77608e-12	1.92388e-10
SNAP25	540.767	-4.03323	0.577249	-6.98699	2.80847e-12	1.93655e-10
PCDH8	272.826	-8.71925	1.24798	-6.98669	2.81446e-12	1.93655e-10
EPHA4	798.575	-1.86096	0.266566	-6.98123	2.92599e-12	2.00612e-10
COLGALT2	249.219	-3.19774	0.458738	-6.97072	3.15321e-12	2.1507e-10
HIVEP3	676.262	-2.66663	0.382561	-6.97045	3.15919e-12	2.1507e-10
TAF4B	179.144	2.96578	0.425594	6.96856	3.20195e-12	2.17214e-10
CEMIP2	1284.52	-2.17574	0.312683	-6.95832	3.44364e-12	2.3279e-10
FOXN3	1512.56	2.14037	0.307792	6.95394	3.55233e-12	2.39298e-10
TLE1	645.031	2.31343	0.333461	6.93763	3.98732e-12	2.67665e-10
RGS20	458.845	-4.16486	0.601092	-6.92883	4.24345e-12	2.83869e-10
VSIG10	146.493	2.48046	0.358017	6.92834	4.25821e-12	2.83871e-10
GREB1	1782.59	-3.10038	0.447896	-6.92211	4.44966e-12	2.95611e-10
HOXA2	127.554	-8.8021	1.27312	-6.91378	4.71902e-12	3.12429e-10
ZNF503	135.263	-6.32666	0.915524	-6.91043	4.83196e-12	3.1881e-10
USP44	306.451	2.78498	0.403555	6.90112	5.15949e-12	3.39258e-10
PRKCE	517.075	-2.45996	0.356721	-6.89604	5.34724e-12	3.50408e-10
TSPAN11	411.495	-2.16591	0.314108	-6.89545	5.36927e-12	3.50659e-10
APOBEC3G	34.8619	-6.44964	0.938328	-6.87354	6.26261e-12	4.0762e-10
FANK1	105.539	-3.55272	0.517106	-6.8704	6.4022e-12	4.15302e-10
NR2F2	197.563	-8.48083	1.23553	-6.86411	6.6907e-12	4.3256e-10
NEDD9	367.175	-2.16379	0.315526	-6.85774	6.99587e-12	4.50777e-10
MIR325HG	1744.81	-3.91507	0.571215	-6.85394	7.18414e-12	4.61365e-10
PLXNC1	117.424	-3.34393	0.48846	-6.84587	7.601e-12	4.86514e-10
HOXB2	184.493	-8.89826	1.30053	-6.84202	7.80835e-12	4.98131e-10
C1GALT1	486.391	1.54982	0.226531	6.84154	7.8344e-12	4.98144e-10
NNMT	157.28	-8.64455	1.26524	-6.83235	8.35345e-12	5.294e-10
CDH7	351.936	-4.0432	0.593843	-6.80853	9.86006e-12	6.22833e-10
ZFP42	161.533	8.50091	1.25097	6.79545	1.07973e-11	6.79806e-10
HYDIN	218.945	-2.8606	0.421293	-6.79005	1.12097e-11	7.03473e-10
LOC105369438	44.164	3.82552	0.563476	6.78914	1.12804e-11	7.0561e-10
TRIM71	1605.81	1.37852	0.203254	6.78224	1.18323e-11	7.33663e-10
KCND2	2445.11	3.41118	0.502961	6.78219	1.18364e-11	7.33663e-10
CLIP4	115.997	-3.54312	0.522421	-6.78211	1.18431e-11	7.33663e-10
GRM4	93.4071	3.86168	0.570438	6.76969	1.29063e-11	7.96963e-10
FAM110B	853.729	-3.2168	0.475262	-6.76849	1.30133e-11	8.01002e-10
GNL3L	413.015	1.53474	0.226863	6.76503	1.33281e-11	8.17771e-10
SOX2-OT	1113.02	-2.9885	0.441837	-6.76381	1.34412e-11	8.22092e-10
SOAT1	115.658	-2.81935	0.41692	-6.76233	1.35787e-11	8.27011e-10
CCDC60	198.346	-5.51041	0.814905	-6.76203	1.36075e-11	8.27011e-10
LOC105378237	160.104	-9.01611	1.33345	-6.76148	1.36593e-11	8.27548e-10
KDR	67.242	5.88247	0.871059	6.75324	1.44584e-11	8.73213e-10
EFNB2	587.489	-3.01574	0.44669	-6.7513	1.46531e-11	8.82207e-10
CGNL1	255.766	3.38021	0.501831	6.73576	1.63078e-11	9.78773e-10
VASH1	156.477	-2.34564	0.348854	-6.72383	1.77003e-11	1.05905e-09
NBPF15	195.503	-1.94277	0.289495	-6.71089	1.93442e-11	1.15382e-09
NFE2L3	314.391	2.13191	0.31819	6.7001	2.08274e-11	1.23846e-09
CST3	104.618	-2.99033	0.447334	-6.68479	2.31257e-11	1.37089e-09
NANOG	33.5891	8.8249	1.32193	6.6758	2.45893e-11	1.45318e-09
HAGLR	120.533	-8.272	1.24002	-6.67088	2.54268e-11	1.49808e-09
APC2	351.239	-3.28551	0.492872	-6.66605	2.62774e-11	1.54347e-09
ITPR3	141.704	2.4065	0.361229	6.66197	2.70181e-11	1.58216e-09
NEURL1B	180.458	-2.99734	0.451223	-6.64271	3.07957e-11	1.79791e-09
CHRNB4	292.689	-4.92525	0.741825	-6.63937	3.15025e-11	1.83362e-09
JPH4	206.063	2.92993	0.441376	6.63816	3.17625e-11	1.84318e-09
MDN1	641.317	1.53646	0.231627	6.63334	3.28183e-11	1.89873e-09
LRRC3B	54.7388	3.3953	0.51197	6.63183	3.31555e-11	1.9125e-09
NR2F1-AS1	871.556	-4.42861	0.668021	-6.62946	3.36926e-11	1.93767e-09
PRKN	812.783	-3.41878	0.515925	-6.62651	3.43712e-11	1.97082e-09
AP1M1	166.349	-1.84471	0.278465	-6.62458	3.48234e-11	1.99083e-09
ESRP1	231.613	7.45211	1.12986	6.59563	4.23451e-11	2.41367e-09
C6orf118	43.709	-5.23514	0.796062	-6.57629	4.8232e-11	2.74112e-09
PCDH9	1231.6	-4.12431	0.627246	-6.57526	4.85699e-11	2.7522e-09
SPTLC2	405.444	1.56178	0.237799	6.56763	5.11211e-11	2.88827e-09
CRB2	384.166	-4.58421	0.698364	-6.56422	5.23058e-11	2.94656e-09
DYNC2LI1	85.2189	-2.39681	0.365815	-6.55196	5.67875e-11	3.1897e-09
IP6K3	36.5661	-5.02707	0.767427	-6.55055	5.73244e-11	3.2105e-09
DISC1FP1	205.841	-3.04027	0.464383	-6.54691	5.87393e-11	3.28021e-09
LOC107986178	78.1956	-4.17808	0.638306	-6.54558	5.92653e-11	3.30001e-09
HTR7	92.4384	5.49289	0.840857	6.53249	6.46845e-11	3.59139e-09
WNT5B	289.118	-5.07794	0.778061	-6.5264	6.73704e-11	3.72976e-09
PCNX2	1128.21	2.32368	0.356316	6.52139	6.9661e-11	3.84553e-09
JAZF1	497.455	2.66009	0.408352	6.51421	7.30734e-11	4.02238e-09
LZTFL1	108.817	-1.98376	0.304578	-6.51314	7.3594e-11	4.0395e-09
SULF1	710.218	-3.63862	0.559362	-6.50494	7.77244e-11	4.25409e-09
LINC00963	83.5265	-2.96375	0.457411	-6.47941	9.20814e-11	5.02561e-09
USP9X	1417.85	1.50072	0.231981	6.46917	9.85423e-11	5.36304e-09
PHLDA1	274.881	3.58815	0.554838	6.46702	9.99525e-11	5.42446e-09
TMEM132D	135.659	3.46573	0.53614	6.46422	1.01821e-10	5.51033e-09
SLC12A2	1127.19	-2.46116	0.381109	-6.45787	1.06184e-10	5.73037e-09
FBLIM1	113.003	3.51025	0.544327	6.4488	1.12743e-10	6.06732e-09
CDH1	220.652	7.90619	1.22616	6.4479	1.13409e-10	6.08324e-09
MARVELD3	38.1821	4.46951	0.693211	6.44755	1.1367e-10	6.08324e-09
CRB1	179.487	-4.18802	0.650256	-6.44056	1.19033e-10	6.3526e-09
MIR99AHG	2277.54	-4.25826	0.662074	-6.43169	1.26191e-10	6.71603e-09
EMID1	129.358	-3.04546	0.473625	-6.4301	1.27516e-10	6.76783e-09
SYT6	216.751	2.70385	0.420801	6.42548	1.31451e-10	6.95753e-09
NRP2	1875.41	-2.01368	0.313641	-6.42031	1.35997e-10	7.17461e-09
SLC7A8	286.555	2.83252	0.441205	6.41997	1.36297e-10	7.17461e-09
ST8SIA2	561.747	-2.60909	0.406628	-6.41641	1.39523e-10	7.32437e-09
PIM2	143.207	2.91496	0.454436	6.41446	1.41321e-10	7.38922e-09
CDH11	1193.08	-1.96906	0.306983	-6.41424	1.41525e-10	7.38922e-09
LOC642484	46.2521	-3.82953	0.597134	-6.41319	1.42507e-10	7.42038e-09
SCRG1	86.8073	-4.28721	0.66933	-6.40522	1.50148e-10	7.79718e-09
MAP3K21	90.6776	3.4767	0.543124	6.40131	1.54052e-10	7.97842e-09
TRNP1	78.6709	4.0048	0.626354	6.39383	1.61779e-10	8.3561e-09
RILPL1	193.259	-2.02214	0.316373	-6.39164	1.64111e-10	8.45394e-09
ELFN1	274.854	-3.40911	0.534043	-6.38357	1.73001e-10	8.86764e-09
GNA14	100.972	5.01428	0.785503	6.38352	1.73063e-10	8.86764e-09
LINC02511	196.634	-3.60786	0.565275	-6.38249	1.74235e-10	8.90399e-09
MDK	1914.53	-2.7833	0.436584	-6.37517	1.82763e-10	9.31512e-09
BTG2	110.288	-4.09663	0.642871	-6.37239	1.86102e-10	9.46024e-09
CRNDE	225.799	-3.61549	0.568162	-6.36348	1.97234e-10	9.99977e-09
LZTS1	133.568	4.30577	0.677421	6.35613	2.06903e-10	1.04624e-08
KCNK2	155.558	-5.16283	0.812446	-6.35468	2.08866e-10	1.05341e-08
PALLD	645.159	-2.64154	0.415849	-6.35216	2.12309e-10	1.06798e-08
KC6	240.423	-3.38769	0.533493	-6.35002	2.15291e-10	1.08016e-08
EPB41L4B	132.768	2.46558	0.388462	6.34703	2.19517e-10	1.0985e-08
APOLD1	106.344	-4.0872	0.644065	-6.34595	2.21057e-10	1.10334e-08
SLFN13	76.4815	2.96771	0.467731	6.34491	2.22555e-10	1.10795e-08
NRG1	2946.6	-2.7793	0.43853	-6.33777	2.3312e-10	1.15755e-08
MLLT3	1230.71	-3.25371	0.513532	-6.33594	2.35895e-10	1.16832e-08
GLYATL2	323.831	-2.08102	0.328922	-6.3268	2.50302e-10	1.23649e-08
ATP7B	182.861	-2.01152	0.318364	-6.31831	2.64443e-10	1.30301e-08
NTN1	375.235	-3.19867	0.506519	-6.31501	2.70151e-10	1.32774e-08
CHODL	539.148	3.83397	0.607245	6.31372	2.72409e-10	1.33543e-08
AFF2	246.251	2.23123	0.353491	6.31199	2.75476e-10	1.34704e-08
RAB9B	69.1055	-3.71095	0.588072	-6.31037	2.78376e-10	1.35777e-08
ZNF781	77.3679	-3.25353	0.51619	-6.30297	2.92002e-10	1.42063e-08
FRRS1L	316.293	-3.51987	0.558632	-6.30087	2.95982e-10	1.43637e-08
CCDC85A	255.813	-3.90032	0.621199	-6.27869	3.41428e-10	1.65275e-08
EDIL3	996.055	2.39493	0.381766	6.27331	3.53461e-10	1.70671e-08
ZNF273	150.11	1.58948	0.253442	6.27158	3.57401e-10	1.72142e-08
ZNF491	63.1252	-3.2222	0.514838	-6.25867	3.88275e-10	1.86546e-08
SAMD12	231.36	1.87506	0.299942	6.25141	4.06762e-10	1.94942e-08
HOXB-AS3	146.501	-8.10904	1.29756	-6.24946	4.11876e-10	1.96904e-08
DLL3	197.748	-5.3569	0.857288	-6.24865	4.14007e-10	1.97432e-08
EBF2	349.65	-5.83217	0.933527	-6.24745	4.17202e-10	1.98465e-08
NMUR2	58.4262	-8.49069	1.35932	-6.24629	4.20321e-10	1.99456e-08
LNCPRESS2	376.878	13.2839	2.12916	6.23902	4.40329e-10	2.08437e-08
MMP17	54.952	4.29069	0.688132	6.23527	4.50992e-10	2.12961e-08
PRSS8	31.4853	3.91108	0.627561	6.23219	4.59968e-10	2.16669e-08
LINC01289	108.212	-8.63676	1.38875	-6.21908	5.0007e-10	2.34984e-08
B3GNT7	54.161	5.94145	0.955903	6.21554	5.11494e-10	2.39767e-08
LIFR	806.462	2.20815	0.355339	6.21421	5.15826e-10	2.41211e-08
SMPDL3B	45.9431	3.76568	0.606651	6.20733	5.3893e-10	2.51405e-08
FSIP2	447.95	-2.7377	0.441806	-6.19662	5.76889e-10	2.68462e-08
DGKK	79.8422	4.79483	0.773992	6.19493	5.83101e-10	2.70699e-08
FHDC1	270.517	3.00452	0.485183	6.19255	5.9199e-10	2.74165e-08
GPC4	491.304	4.21456	0.681003	6.18876	6.06411e-10	2.8017e-08
AP1S2	330.852	2.13728	0.345468	6.18661	6.14708e-10	2.83324e-08
FGF14	1176.92	-3.82387	0.618985	-6.17763	6.50691e-10	2.99193e-08
ARHGEF4	436.245	-2.77181	0.448801	-6.17604	6.57296e-10	3.01511e-08
HCFC2	132.475	-2.42181	0.392795	-6.16557	7.02284e-10	3.21382e-08
SLITRK5	211.57	-2.87149	0.465919	-6.16305	7.13563e-10	3.2577e-08
ADD2	947.088	1.701	0.276365	6.15493	7.51125e-10	3.42108e-08
LAD1	21.8343	6.24731	1.01517	6.15395	7.55788e-10	3.4342e-08
SKIL	496.364	2.62204	0.426257	6.15131	7.68464e-10	3.48358e-08
MMRN1	47.2501	-6.70678	1.09046	-6.1504	7.72882e-10	3.49197e-08
RGS22	55.1257	-3.19984	0.520283	-6.15018	7.7394e-10	3.49197e-08
KCNQ3	116.909	2.96129	0.481582	6.14908	7.79332e-10	3.50809e-08
POLR3G	207.163	3.82831	0.623397	6.14105	8.19755e-10	3.68144e-08
HS3ST3B1	376.294	-2.66859	0.434602	-6.1403	8.23673e-10	3.69044e-08
NFASC	1340.03	-2.26401	0.36879	-6.13903	8.30262e-10	3.71133e-08
ZNF883	114.088	2.40026	0.391039	6.13815	8.34862e-10	3.72141e-08
SLC24A3	1506.25	2.99387	0.487771	6.13786	8.36382e-10	3.72141e-08
GRIA1	1249.74	-3.01763	0.491681	-6.13738	8.38953e-10	3.72426e-08
TANC2	1231.94	-2.05323	0.33476	-6.13343	8.60046e-10	3.80332e-08
TENM2	1938.12	-3.33707	0.54409	-6.13331	8.60712e-10	3.80332e-08
DNAH6	137.997	-3.01505	0.492068	-6.1273	8.9382e-10	3.94058e-08
LOC105377379	26.0703	6.8914	1.12501	6.12561	9.0336e-10	3.97355e-08
CXCL12	64.0365	4.2201	0.689082	6.12424	9.11159e-10	3.99872e-08
PHACTR2	688.352	1.95208	0.319074	6.11795	9.47844e-10	4.15026e-08
ADAMTS9	351.794	-4.00738	0.655285	-6.11547	9.62717e-10	4.20583e-08
RGMA	1594.94	-3.09741	0.506611	-6.11398	9.71772e-10	4.23578e-08
IRX1	240.812	-4.03176	0.660649	-6.10273	1.04271e-09	4.53474e-08
FIGNL2	221.193	-2.48474	0.407243	-6.10136	1.0517e-09	4.56351e-08
HCN1	117.677	3.31274	0.54313	6.09935	1.065e-09	4.61084e-08
PLXNA3	402.878	-2.30375	0.378492	-6.08665	1.15298e-09	4.98057e-08
GRIA4	1361.87	2.64722	0.435816	6.07417	1.2463e-09	5.37162e-08
LINC02820	161.056	-2.896	0.478377	-6.05381	1.41461e-09	6.08343e-08
SESTD1	1134.01	-1.5751	0.260392	-6.04896	1.45783e-09	6.25537e-08
PPM1B	479.568	1.59132	0.2631	6.04833	1.46354e-09	6.26592e-08
S1PR1	124.033	-5.38497	0.89258	-6.03304	1.60904e-09	6.87356e-08
MYOF	344.01	-2.62355	0.435029	-6.03075	1.63203e-09	6.95634e-08
APBA1	234.312	-3.17411	0.526354	-6.03037	1.6358e-09	6.95703e-08
CCDC178	78.4062	-4.3492	0.721351	-6.02924	1.64733e-09	6.99065e-08
PRDM14	28.4929	5.62908	0.93377	6.02834	1.65654e-09	7.01428e-08
GHR	333.921	-2.97656	0.494285	-6.02197	1.72312e-09	7.28017e-08
KPNA3	514.97	1.19068	0.197784	6.02014	1.7427e-09	7.34679e-08
CADM3	547.04	-2.77197	0.460819	-6.01531	1.79546e-09	7.55268e-08
PRR5L	149.673	-2.54536	0.423501	-6.01028	1.852e-09	7.77357e-08
OSBPL6	249.248	-2.13927	0.356126	-6.00708	1.88898e-09	7.91153e-08
LOC105373310	50.6408	4.06266	0.677402	5.99741	2.00491e-09	8.37889e-08
LOC101927947	774.338	-4.0314	0.673624	-5.98464	2.1687e-09	9.04375e-08
MEGF10	142.423	4.52196	0.756482	5.97762	2.26421e-09	9.42164e-08
ALK	713.892	-5.47433	0.916301	-5.97438	2.30965e-09	9.59004e-08
NCOA6	681.466	-1.68936	0.283009	-5.9693	2.38279e-09	9.87245e-08
EPHB2	838.626	-1.8737	0.313964	-5.96788	2.40355e-09	9.93707e-08
GRK5	391.526	-2.54446	0.426496	-5.96597	2.43178e-09	1.00323e-07
ASIC1	123.083	-2.87112	0.481397	-5.96414	2.4593e-09	1.01241e-07
ZNF704	601.352	-1.97247	0.330854	-5.96177	2.49527e-09	1.02503e-07
CXXC5	332.715	2.05462	0.344862	5.95781	2.55636e-09	1.04789e-07
GALNT14	248.589	2.95544	0.496549	5.95196	2.64945e-09	1.08375e-07
PAWR	738.577	1.4146	0.23769	5.95146	2.65764e-09	1.08479e-07
PCDH1	549.015	3.53068	0.59387	5.9452	2.76117e-09	1.12467e-07
HES4	50.9754	-8.17996	1.37715	-5.93978	2.85402e-09	1.1587e-07
CAPRIN2	297.07	1.7153	0.28879	5.93962	2.85675e-09	1.1587e-07
SOGA3	641.287	-2.02613	0.341732	-5.92901	3.04765e-09	1.23353e-07
ADGRD1	49.7721	-4.18941	0.706965	-5.9259	3.10586e-09	1.25445e-07
OPCML	2300.81	3.10003	0.523196	5.92519	3.11943e-09	1.2573e-07
CA4	111.576	-4.596	0.776099	-5.92193	3.18182e-09	1.27977e-07
KCNK1	27.9562	5.93707	1.00457	5.91007	3.41965e-09	1.37256e-07
DGKB	1261.94	-3.12932	0.52975	-5.90716	3.4805e-09	1.39408e-07
TESMIN	37.0668	4.09258	0.694327	5.89431	3.76258e-09	1.50394e-07
GFOD1	224.042	2.31806	0.39339	5.89252	3.80342e-09	1.51712e-07
ROR2	310.157	-2.56243	0.435093	-5.88938	3.87644e-09	1.54305e-07
MYOZ3	32.7298	5.21452	0.885492	5.88884	3.8892e-09	1.54493e-07
LOC101927745	42.6763	-7.43943	1.26454	-5.88312	4.02614e-09	1.59604e-07
RBPMS2	189.666	3.71715	0.631983	5.88172	4.06015e-09	1.60622e-07
FZD10	32.9308	-8.74529	1.48834	-5.87586	4.2065e-09	1.6607e-07
FAM160A1	248.717	3.22249	0.548824	5.87162	4.31567e-09	1.70032e-07
DENND6B	92.4791	-2.72632	0.464389	-5.87077	4.33768e-09	1.70551e-07
VPS37B	119.774	-2.42165	0.412567	-5.86971	4.36555e-09	1.71297e-07
PRR14	73.2456	-3.04509	0.520299	-5.85258	4.8401e-09	1.89531e-07
MAL	49.3706	-8.52987	1.45796	-5.85054	4.89992e-09	1.91441e-07
NKAIN2	1101.32	-3.20006	0.546996	-5.85024	4.90874e-09	1.91441e-07
NPC1L1	32.7392	-5.03353	0.860967	-5.84637	5.02425e-09	1.9555e-07
LINC01410	55.8637	-3.74724	0.641032	-5.84563	5.04656e-09	1.96022e-07
PROS1	164.478	-2.52611	0.432342	-5.84285	5.13162e-09	1.98925e-07
KIAA0040	34.0751	6.10189	1.04443	5.84234	5.14712e-09	1.99125e-07
FAM169A	509.393	1.88134	0.322121	5.84049	5.2046e-09	2.00946e-07
FLVCR1	621.556	1.48208	0.253794	5.83971	5.2292e-09	2.01491e-07
LOC100422781	79.8781	-3.19484	0.547443	-5.83593	5.3492e-09	2.05704e-07
LINC01456	660.657	-2.9202	0.500645	-5.83287	5.44818e-09	2.09093e-07
GALNT6	19.5655	5.73782	0.985542	5.82199	5.81499e-09	2.22727e-07
FAM27E4	39.1686	-5.11079	0.879654	-5.80999	6.24751e-09	2.38819e-07
CCDC85C	498.657	-2.09556	0.360747	-5.80895	6.28668e-09	2.3984e-07
USP12	303.497	1.38402	0.238467	5.8038	6.48274e-09	2.46831e-07
HMCN2	68.202	3.44873	0.594382	5.80222	6.54413e-09	2.48584e-07
HOXB7	109.246	-7.64911	1.31837	-5.80196	6.55458e-09	2.48584e-07
LOC105370469	60.4419	-4.05558	0.699162	-5.80063	6.60668e-09	2.50067e-07
FAM228B	233.629	-2.21607	0.382656	-5.79128	6.9851e-09	2.63872e-07
LOC105375704	85.9145	-4.35657	0.752872	-5.78659	7.18278e-09	2.70809e-07
SLC30A4	66.2728	-7.15992	1.24133	-5.76796	8.02373e-09	3.01924e-07
LINC00470	101.506	-2.559	0.443816	-5.76591	8.12194e-09	3.05024e-07
LOC105373409	20.2682	7.11271	1.23432	5.76245	8.29023e-09	3.10738e-07
FBRS	167.984	-2.62588	0.45632	-5.75446	8.69166e-09	3.25153e-07
MORC4	95.488	-2.84464	0.494535	-5.75215	8.8113e-09	3.28989e-07
MAP2	3485.55	-1.88558	0.328054	-5.74778	9.04222e-09	3.36958e-07
ZNF589	301.09	1.48566	0.258626	5.74444	9.22237e-09	3.43008e-07
TGFB2	521.693	-2.87112	0.499912	-5.74326	9.28711e-09	3.44693e-07
ARMC3	53.3334	-5.214	0.907894	-5.74296	9.30344e-09	3.44693e-07
GLB1L3	53.2085	5.11265	0.890549	5.74101	9.41156e-09	3.48029e-07
DMXL2	900.675	-1.71347	0.298654	-5.73731	9.61929e-09	3.55029e-07
KAT2B	185.825	-2.47817	0.432052	-5.73582	9.7039e-09	3.57467e-07
AK4	398.164	2.75537	0.480576	5.73347	9.83959e-09	3.61774e-07
APLP1	327.99	-3.31701	0.578589	-5.73293	9.87116e-09	3.62243e-07
SEC31B	111.628	-2.29863	0.401595	-5.72377	1.04189e-08	3.81616e-07
HSD11B2	70.7554	3.0565	0.53501	5.71299	1.11011e-08	4.05833e-07
GFPT2	199.898	2.00152	0.350445	5.71137	1.12071e-08	4.08934e-07
TXLNG	269.165	1.73135	0.30316	5.71103	1.12296e-08	4.08977e-07
GLI3	886.993	-1.68992	0.29644	-5.7007	1.19316e-08	4.33725e-07
OSBPL10	302.246	2.34387	0.411677	5.69346	1.24489e-08	4.51676e-07
PPM1H	353.611	2.11422	0.371392	5.69268	1.2506e-08	4.52894e-07
DENND2B	395.547	-1.48735	0.261406	-5.68981	1.27184e-08	4.59722e-07
CSMD1	276.555	3.46914	0.610108	5.68611	1.29965e-08	4.68898e-07
DUOX1	109.309	-2.50768	0.441156	-5.68433	1.31325e-08	4.72918e-07
SYNJ1	238.829	-1.87436	0.329778	-5.68369	1.31818e-08	4.73806e-07
SNAP91	477.919	-2.71497	0.477862	-5.68149	1.33524e-08	4.79044e-07
LASP1	403.445	1.73199	0.305178	5.67536	1.38399e-08	4.9526e-07
TRMT9B-2	186.271	-3.26452	0.57523	-5.67516	1.38558e-08	4.9526e-07
STC2	425.261	-2.17381	0.383174	-5.67317	1.40182e-08	5.00137e-07
QSER1	1288.9	1.61662	0.285004	5.67228	1.40911e-08	5.01808e-07
NMNAT2	358.48	2.23123	0.393595	5.66886	1.4375e-08	5.10976e-07
TASOR2	873.132	0.942963	0.166381	5.6675	1.44893e-08	5.14091e-07
CDCP1	46.3059	5.72687	1.01141	5.66226	1.49392e-08	5.29078e-07
DLL4	137.394	-6.56738	1.16043	-5.65945	1.5186e-08	5.36832e-07
LOC107987075	51.6248	-4.58888	0.811333	-5.65597	1.54968e-08	5.46816e-07
EEPD1	116.672	2.93546	0.519897	5.64624	1.63996e-08	5.77613e-07
DPYD	325.952	-2.53432	0.44891	-5.6455	1.64705e-08	5.78436e-07
FRMPD3	105.843	-3.73319	0.661284	-5.64537	1.6483e-08	5.78436e-07
IL1RAPL1	508.489	-2.87322	0.509059	-5.64418	1.65973e-08	5.8139e-07
PIK3R1	687.016	-2.75305	0.488119	-5.64011	1.69943e-08	5.94214e-07
MMP2	228.294	-2.85905	0.5071	-5.63804	1.71998e-08	6.0031e-07
WIPF1	167.245	-2.54947	0.452873	-5.62953	1.80698e-08	6.29534e-07
VSX1	142.334	-7.58419	1.3481	-5.62583	1.84614e-08	6.42015e-07
IRX5	42.5913	-7.07538	1.25805	-5.6241	1.86476e-08	6.47324e-07
RAB17	99.6782	10.3832	1.85153	5.6079	2.04798e-08	7.09646e-07
DPPA4	830.634	2.94294	0.524921	5.60645	2.06519e-08	7.13164e-07
POU6F2	357.121	-2.47031	0.440621	-5.60642	2.06553e-08	7.13164e-07
CALB1	60.394	3.46664	0.618665	5.60342	2.10165e-08	7.24335e-07
CDH6	1646.74	-3.16292	0.566528	-5.58299	2.36423e-08	8.13378e-07
TTLL11	275.314	-2.44014	0.437264	-5.58048	2.39858e-08	8.23726e-07
CCDC6	721.751	1.23355	0.221284	5.57454	2.48186e-08	8.50811e-07
HOXB-AS1	32.6188	-7.79125	1.39773	-5.57421	2.48661e-08	8.50925e-07
ZNF862	108.956	-2.07913	0.373081	-5.57288	2.50568e-08	8.55929e-07
ANKFN1	84.0886	-3.2863	0.589997	-5.57003	2.54698e-08	8.68498e-07
XIAP	298.729	1.50443	0.270273	5.56633	2.60161e-08	8.85559e-07
LINC02246	128.556	-2.35955	0.424301	-5.56102	2.68201e-08	9.11317e-07
SLC29A4	158.772	-2.51966	0.453156	-5.56026	2.69378e-08	9.13703e-07
LOC105375220	44.3666	-4.58518	0.824683	-5.55994	2.69875e-08	9.13779e-07
ANKDD1B	64.3907	-2.63656	0.474585	-5.55551	2.76804e-08	9.35598e-07
MCF2L	340.569	-2.07633	0.374387	-5.54593	2.92394e-08	9.86561e-07
HSPA4	735.154	1.6116	0.290629	5.54521	2.93596e-08	9.88886e-07
MYC	196.878	2.95293	0.532798	5.54231	2.98514e-08	1.0037e-06
D21S2088E	26.5905	7.60975	1.37312	5.54196	2.99101e-08	1.00392e-06
ESRRG	759.717	-2.93105	0.529195	-5.53869	3.04735e-08	1.02105e-06
EPHA3	851.522	-3.43501	0.620291	-5.53773	3.0641e-08	1.02488e-06
CNMD	78.4311	3.04541	0.550487	5.5322	3.16238e-08	1.05592e-06
CFAP47	163.415	-4.6162	0.834827	-5.52953	3.21083e-08	1.07024e-06
SKIDA1	190.443	-2.07785	0.376025	-5.52582	3.27943e-08	1.09122e-06
DRP2	57.9621	-2.78305	0.504006	-5.52186	3.35434e-08	1.11422e-06
KALRN	3885.25	-2.41152	0.437142	-5.51657	3.45685e-08	1.14629e-06
CDK5RAP3	285.278	-1.86674	0.338546	-5.514	3.50762e-08	1.16113e-06
LNCPRESS1	21.6208	7.36087	1.33601	5.50958	3.59684e-08	1.18862e-06
HOXC4	268.937	-6.85766	1.24528	-5.50693	3.65149e-08	1.20462e-06
LOC105377703	208.1	-3.88288	0.706457	-5.49626	3.87921e-08	1.27755e-06
CCDC186	216.866	2.37693	0.432695	5.49332	3.94451e-08	1.29684e-06
PWRN4	51.5368	-6.2995	1.14702	-5.49207	3.97247e-08	1.30381e-06
ZBTB20	1258.86	-2.62374	0.477789	-5.49141	3.98739e-08	1.30648e-06
IFI16	110.761	-3.38506	0.616783	-5.48825	4.05944e-08	1.32783e-06
TENT5B	56.2538	4.06937	0.741821	5.48564	4.11964e-08	1.34524e-06
ADAMTS17	116.015	3.18551	0.580973	5.48306	4.18025e-08	1.36272e-06
GNG12	194.688	2.18897	0.399259	5.48259	4.19139e-08	1.36404e-06
RNF144A	564.436	-1.93424	0.353514	-5.47146	4.46335e-08	1.4501e-06
RFX2	132.254	-3.08682	0.564731	-5.466	4.60311e-08	1.49299e-06
MGAT3	174.341	-1.68284	0.308021	-5.46337	4.6717e-08	1.51269e-06
MXRA8	81.2062	-2.6787	0.490529	-5.46083	4.73922e-08	1.53198e-06
PTCHD1-AS	240.25	2.61834	0.480099	5.45374	4.93217e-08	1.59168e-06
HNF1B-2	16.0907	-8.086	1.48294	-5.45268	4.96153e-08	1.59848e-06
AGO2	731.118	1.58252	0.290268	5.45194	4.98231e-08	1.60249e-06
TNIK	1215.44	2.74692	0.504147	5.44865	5.07531e-08	1.62968e-06
BMP7	281.479	-3.2324	0.593627	-5.44517	5.17553e-08	1.6591e-06
SCUBE3	102.359	-2.37245	0.435784	-5.44409	5.20706e-08	1.66568e-06
STARD10	67.7653	-2.04997	0.376564	-5.44388	5.21335e-08	1.66568e-06
PRKX	219.018	1.75471	0.32291	5.43404	5.50926e-08	1.75731e-06
RNF212B	67.9066	-2.75114	0.506337	-5.43341	5.52861e-08	1.76056e-06
LOC100506974	153.804	-3.24111	0.597021	-5.4288	5.67355e-08	1.80374e-06
SATB2	192.811	-2.65343	0.489258	-5.42337	5.84863e-08	1.85634e-06
RMST	920.828	2.35393	0.434122	5.42228	5.88445e-08	1.86463e-06
TBC1D19	545.519	-2.06671	0.38174	-5.41393	6.16578e-08	1.95057e-06
EBF1	926.046	-6.51938	1.20582	-5.4066	6.42315e-08	2.02866e-06
EML1	338.035	-1.9659	0.363991	-5.40097	6.62816e-08	2.08998e-06
CEP112	560.759	-2.24893	0.416541	-5.39904	6.69972e-08	2.1091e-06
GDI2	735.335	1.17189	0.217182	5.39588	6.81888e-08	2.14311e-06
ATP6V0E2-AS1	30.1624	-3.86618	0.716894	-5.39295	6.93104e-08	2.17481e-06
ANKRD36C	601.296	-1.49501	0.277245	-5.3924	6.95219e-08	2.1779e-06
MAGI2-AS3	181.092	-2.57335	0.477245	-5.3921	6.96407e-08	2.17808e-06
CFAP299	227.22	-4.27218	0.792538	-5.39051	7.02593e-08	2.19387e-06
RARA	276.092	-1.76461	0.327395	-5.38986	7.05111e-08	2.19817e-06
KLF7	771.067	1.92611	0.357648	5.38549	7.22493e-08	2.24872e-06
TTLL7	568.627	-2.47885	0.460657	-5.38111	7.40277e-08	2.30035e-06
ATP8A2	346.461	2.38285	0.443166	5.37688	7.57893e-08	2.3513e-06
FOXP4	458.36	-1.97882	0.368241	-5.37373	7.71263e-08	2.38639e-06
TNFRSF11A	51.592	3.58493	0.667134	5.37363	7.71682e-08	2.38639e-06
SCML1	104.98	-2.56579	0.477526	-5.37308	7.74019e-08	2.38978e-06
STOX1	194.12	-2.47	0.460204	-5.36719	7.99726e-08	2.4652e-06
SHISAL1	151.148	2.61401	0.4872	5.36537	8.07812e-08	2.48615e-06
IFITM2	67.9138	2.72102	0.507415	5.36251	8.20717e-08	2.52184e-06
SVEP1	83.8132	-2.93238	0.547216	-5.35872	8.38124e-08	2.57123e-06
B3GALT5-AS1	37.9789	4.00676	0.747935	5.35709	8.45717e-08	2.59039e-06
SOX3	209.113	-2.8223	0.52696	-5.35582	8.51706e-08	2.6046e-06
MAATS1	164.172	-2.1827	0.4076	-5.355	8.55541e-08	2.61218e-06
EMX1	24.5147	4.30242	0.805864	5.33888	9.35203e-08	2.85089e-06
SMARCD3	116.721	-2.56239	0.480254	-5.33548	9.52901e-08	2.90025e-06
RHBDL3	1115.41	-2.40131	0.450283	-5.33289	9.66625e-08	2.93738e-06
CDCA7L	192.482	1.86619	0.350086	5.33066	9.78561e-08	2.96897e-06
ZNF107	352.766	1.53574	0.288169	5.3293	9.85922e-08	2.9866e-06
SGTB	175.178	1.82265	0.342059	5.32846	9.90486e-08	2.99571e-06
ZNF708	368.356	1.12512	0.211206	5.32712	9.97825e-08	3.01318e-06
LINC00907	144.383	-2.93977	0.551985	-5.32582	1.00498e-07	3.03004e-06
LINC00428	68.322	7.6909	1.44538	5.32102	1.03189e-07	3.10631e-06
LOC105375158	151.416	-4.49685	0.845334	-5.31961	1.03988e-07	3.12549e-06
ADCY2	1518.74	3.46025	0.650563	5.31886	1.0442e-07	3.13358e-06
ELOVL2	195.035	-2.97763	0.560197	-5.31533	1.06465e-07	3.18997e-06
LINC00458	15.1817	6.7479	1.2711	5.30871	1.10405e-07	3.30291e-06
GRIK4	114.333	3.02041	0.569397	5.30458	1.1293e-07	3.37319e-06
THNSL2	67.7357	-2.64989	0.499755	-5.30239	1.14299e-07	3.4088e-06
PTPRO	430.309	-2.46013	0.464121	-5.30063	1.15407e-07	3.43651e-06
BNC2	586.404	2.47625	0.467784	5.29357	1.19951e-07	3.56631e-06
FLT1	342.854	6.28727	1.18796	5.29248	1.20667e-07	3.58209e-06
ONECUT2	1554.86	-2.46514	0.465975	-5.29029	1.22126e-07	3.6198e-06
RGL3	27.9198	5.08505	0.961568	5.28829	1.23466e-07	3.6539e-06
ARHGEF3	131.61	1.8747	0.354531	5.28784	1.23769e-07	3.65727e-06
SPATA18	52.9454	-2.84736	0.539157	-5.28114	1.28386e-07	3.78788e-06
TNC	394.575	-3.79918	0.719902	-5.27735	1.31062e-07	3.86093e-06
UBE2G1	567.267	1.13487	0.215415	5.2683	1.37691e-07	4.05001e-06
SLC15A3	153.832	-3.7136	0.705335	-5.26501	1.40185e-07	4.11707e-06
RASGRP2	19.6468	3.45534	0.656472	5.2635	1.41341e-07	4.14471e-06
MIR4435-2HG	213.642	2.32935	0.442799	5.2605	1.43664e-07	4.20644e-06
HK1	431.932	1.5722	0.299067	5.25702	1.46409e-07	4.28029e-06
RHBDL2	54.4895	-2.9079	0.553591	-5.25279	1.49811e-07	4.37311e-06
LOC728392	136.681	-1.92603	0.367339	-5.24321	1.57808e-07	4.59958e-06
RET	71.3139	2.92222	0.558127	5.23577	1.64296e-07	4.78147e-06
FMN2	464.215	-2.61042	0.498756	-5.23387	1.65999e-07	4.82374e-06
SCUBE2	40.0411	-6.56307	1.25462	-5.23114	1.6847e-07	4.88817e-06
RAB3B	666.87	1.56699	0.299576	5.23068	1.68886e-07	4.89286e-06
PTCH2	46.3372	-4.32007	0.826005	-5.23008	1.69437e-07	4.90145e-06
GLDN	95.2634	-2.75676	0.527328	-5.22778	1.71553e-07	4.95523e-06
GPC5	237.561	-2.58092	0.494098	-5.22349	1.75577e-07	5.06389e-06
CNTN1	476.785	2.21582	0.424917	5.21471	1.84101e-07	5.29732e-06
CARD11	53.208	4.4839	0.859875	5.21459	1.84221e-07	5.29732e-06
APLNR	69.6903	-4.65603	0.893685	-5.20992	1.8892e-07	5.42433e-06
TMEM169	224.179	-1.84418	0.354001	-5.20955	1.89299e-07	5.42714e-06
VXN	588.408	-6.73699	1.29426	-5.2053	1.93679e-07	5.54447e-06
ZNF121	562.807	1.66009	0.319336	5.19858	2.00817e-07	5.73919e-06
SPTB	70.2168	-2.86157	0.550477	-5.19834	2.01077e-07	5.73919e-06
ZDHHC22	108.03	2.40867	0.463743	5.19398	2.05848e-07	5.86668e-06
LRFN5	631.876	-2.83261	0.545397	-5.19367	2.06194e-07	5.86784e-06
DIRAS2	214.637	-7.06037	1.35969	-5.19262	2.07358e-07	5.89228e-06
MARC2	30.8101	3.62294	0.697989	5.19054	2.09681e-07	5.94496e-06
KIT	132.82	-2.47153	0.476179	-5.19033	2.09922e-07	5.94496e-06
TMEM8B	172.407	-1.6971	0.326986	-5.19014	2.10138e-07	5.94496e-06
MSX1	17.2299	-6.51109	1.25666	-5.18126	2.20392e-07	6.21925e-06
IRS4	41.79	2.58414	0.498754	5.18119	2.20479e-07	6.21925e-06
SMYD2	198.049	-2.61637	0.505018	-5.18075	2.20998e-07	6.22478e-06
FZD10-AS1	20.627	-5.7224	1.1048	-5.17959	2.22368e-07	6.25423e-06
LOC105377448	62.8193	-4.28361	0.827125	-5.17891	2.23183e-07	6.26798e-06
JADE2	92.9932	4.09069	0.790819	5.17272	2.30707e-07	6.46988e-06
LOC107986399	20.973	-7.2637	1.4049	-5.17026	2.33763e-07	6.54605e-06
PRKCI	474.447	1.77036	0.342487	5.16912	2.35195e-07	6.57659e-06
DNAJB6	460.313	1.50479	0.291256	5.16656	2.38437e-07	6.65758e-06
LINGO1	156.945	-2.69607	0.52224	-5.16251	2.43663e-07	6.79366e-06
HECW1	560.505	3.06758	0.594289	5.16177	2.44627e-07	6.81068e-06
LINC01416	111.182	-2.98503	0.578462	-5.16027	2.46588e-07	6.85535e-06
CBX8	38.8484	-3.99437	0.774957	-5.15431	2.54563e-07	7.06687e-06
PLCB1	1245.79	-2.04629	0.397028	-5.15403	2.54947e-07	7.06734e-06
SHISA2	103.015	6.28449	1.21945	5.15353	2.55629e-07	7.07607e-06
VPS13C	756.303	-1.30702	0.254199	-5.14173	2.72221e-07	7.52456e-06
STEAP3	60.7272	3.24741	0.631728	5.14051	2.73987e-07	7.56252e-06
ZBBX	75.9242	-2.4381	0.474318	-5.14022	2.74419e-07	7.56361e-06
FAM83F	39.5561	5.15822	1.00388	5.13827	2.77279e-07	7.63152e-06
CDS1	111.102	2.50144	0.486952	5.13694	2.79253e-07	7.67489e-06
EFNB1	164.949	-2.66405	0.518648	-5.13653	2.79859e-07	7.68058e-06
TSR1	196.101	1.53073	0.298096	5.13502	2.82115e-07	7.73148e-06
DCC	3597.28	-2.50298	0.487513	-5.13419	2.83366e-07	7.75472e-06
LINC00278	28.876	-6.10559	1.18989	-5.13123	2.87854e-07	7.86639e-06
CEBPZ	295.784	1.89152	0.36881	5.1287	2.91754e-07	7.96167e-06
LOC102724832	261.771	-2.11379	0.412309	-5.12672	2.94831e-07	8.03424e-06
LOC107984526	29.3433	-5.35361	1.04475	-5.12431	2.98624e-07	8.12611e-06
MAP9	165.746	1.6817	0.328363	5.12145	3.03187e-07	8.23866e-06
LOC107986479	16.2992	-7.04102	1.37526	-5.11979	3.05876e-07	8.3e-06
KIRREL3	944.192	-2.60874	0.509621	-5.11899	3.07175e-07	8.32353e-06
LOC105371808	13.2103	-7.02616	1.37316	-5.11678	3.10792e-07	8.40972e-06
BBS2	155.282	-1.59442	0.311738	-5.11461	3.14389e-07	8.4951e-06
ESCO1	337.033	1.22665	0.240089	5.10914	3.2362e-07	8.73231e-06
MN1	306.619	-2.26051	0.44253	-5.10815	3.25327e-07	8.76609e-06
AIM2	153.627	-2.72514	0.533988	-5.10338	3.33643e-07	8.9776e-06
PAX6-AS1	122.139	-7.31284	1.43324	-5.10231	3.35537e-07	9.01597e-06
DNMT3A	619.81	1.23053	0.241184	5.10202	3.36053e-07	9.01728e-06
ARFGAP3	115.306	-1.80119	0.35327	-5.09862	3.42146e-07	9.16112e-06
CFAP221	86.8136	-3.07763	0.603636	-5.09849	3.42365e-07	9.16112e-06
ST18	919.097	-5.76912	1.13169	-5.0978	3.4363e-07	9.18221e-06
PRUNE2	188.551	3.0852	0.605454	5.09569	3.47473e-07	9.27205e-06
CEP170B	148.972	2.66686	0.524218	5.08731	3.63183e-07	9.67784e-06
ZHX3	341.41	-1.30998	0.257697	-5.08341	3.70715e-07	9.8649e-06
JAKMIP2-AS1	20.2512	5.92153	1.16499	5.08292	3.71682e-07	9.877e-06
CGN	83.9999	2.17283	0.427526	5.08233	3.72842e-07	9.89418e-06
SPATA7	279.412	-1.55769	0.306868	-5.07611	3.85237e-07	1.0209e-05
ONECUT1	1262.11	-2.00687	0.395827	-5.07008	3.97656e-07	1.05237e-05
MIR4713HG	309.126	-2.47806	0.488804	-5.06964	3.98564e-07	1.05333e-05
NSUN2	300.446	1.07229	0.211685	5.06548	4.07382e-07	1.07515e-05
GRIN2B	416.653	2.89514	0.571594	5.06502	4.08362e-07	1.07627e-05
FLNC	442.862	-2.80226	0.553291	-5.06472	4.09008e-07	1.07649e-05
LOC105377872	44.4085	-3.98036	0.786141	-5.06316	4.12354e-07	1.08382e-05
LOC105377975	45.4848	-4.39096	0.867505	-5.06159	4.15767e-07	1.0913e-05
NTRK3	1037.45	-2.36524	0.46769	-5.05729	4.25251e-07	1.11468e-05
RCAN3	75.4491	3.08733	0.610794	5.05462	4.31247e-07	1.12886e-05
SOBP	1216.19	-2.61953	0.51836	-5.05348	4.33823e-07	1.13406e-05
SMAD6	79.4233	-3.38379	0.669674	-5.05289	4.35179e-07	1.13607e-05
FOXD3-AS1	27.5926	6.59691	1.30637	5.04981	4.42252e-07	1.15297e-05
CACNG7	80.2573	2.21735	0.439178	5.04886	4.44452e-07	1.15714e-05
NR3C1	338.739	2.45251	0.485873	5.04765	4.47288e-07	1.16295e-05
NECAB1	43.7193	2.84554	0.563804	5.04704	4.48714e-07	1.16509e-05
LOC107984035	127.589	-3.336	0.66119	-5.04544	4.52468e-07	1.17325e-05
SMUG1	195.7	-2.62676	0.520756	-5.04413	4.55582e-07	1.17974e-05
LOC101927179	85.4606	1.72495	0.342011	5.04354	4.56999e-07	1.18117e-05
EPCAM	90.5377	3.39718	0.673591	5.04339	4.5736e-07	1.18117e-05
ARHGAP24	153.81	-2.44392	0.484799	-5.04111	4.62848e-07	1.19374e-05
ULK2	196.558	-1.43846	0.285451	-5.03923	4.67406e-07	1.20388e-05
SCN7A	91.7965	-3.10174	0.615703	-5.03771	4.71128e-07	1.21185e-05
ARNT2	685.777	-1.57357	0.312701	-5.03218	4.84941e-07	1.24572e-05
LOC101927483	23.9457	4.54468	0.903234	5.03156	4.86508e-07	1.24808e-05
PWRN4-2	43.1929	-5.13147	1.02077	-5.02708	4.98009e-07	1.27588e-05
GLRA2	228.447	-1.79282	0.356711	-5.02598	5.00866e-07	1.2815e-05
TGIF1	200.257	2.20564	0.439288	5.02094	5.14199e-07	1.31327e-05
GAS1	89.5558	-3.05826	0.609121	-5.02077	5.14648e-07	1.31327e-05
KLKB1	21.6648	3.70691	0.738422	5.02004	5.16618e-07	1.31656e-05
LOC105372084	57.8252	-3.81667	0.760448	-5.01898	5.19473e-07	1.32208e-05
SEL1L3	231.796	2.27826	0.454048	5.01767	5.23019e-07	1.32935e-05
ASB18	141.798	-3.50439	0.69901	-5.01337	5.3485e-07	1.35763e-05
FZD1	57.6086	-3.39014	0.676498	-5.0113	5.40625e-07	1.37048e-05
OLFM1	273.986	1.96384	0.392075	5.00885	5.47558e-07	1.38624e-05
FSIP2-AS2	57.639	-3.84352	0.768041	-5.00432	5.60586e-07	1.41736e-05
LYAR	125.318	2.13868	0.427813	4.99909	5.76006e-07	1.45443e-05
MPP1	33.7944	3.08436	0.617113	4.99805	5.79139e-07	1.46043e-05
FN1	737.597	-2.07148	0.414559	-4.99683	5.82807e-07	1.46776e-05
NBPF1	197.207	-1.35968	0.272207	-4.99501	5.8833e-07	1.47973e-05
ZBTB2	153.893	1.29496	0.259328	4.99351	5.92906e-07	1.4893e-05
RNF207	99.4373	-2.73098	0.547148	-4.9913	5.99732e-07	1.50448e-05
ZNF703	73.4434	-4.36529	0.874772	-4.9902	6.0317e-07	1.51114e-05
COL26A1	283.733	2.34426	0.469939	4.98843	6.08728e-07	1.52308e-05
BMP1	127.239	-2.37031	0.475476	-4.98513	6.19195e-07	1.54726e-05
LOC107986774	35.1759	-4.31601	0.865949	-4.98414	6.22384e-07	1.55322e-05
EZR	558.133	1.9705	0.395534	4.98186	6.29758e-07	1.56959e-05
CARMIL1	367.788	1.82952	0.367615	4.97673	6.46675e-07	1.60967e-05
LOC107985661	32.7493	3.2797	0.659135	4.97576	6.49922e-07	1.61566e-05
LOC107984266	19.0146	-7.81914	1.57247	-4.97251	6.60918e-07	1.64088e-05
TF	103.68	-2.54743	0.513461	-4.9613	7.00229e-07	1.73624e-05
ARHGEF17	381.29	-1.97458	0.398149	-4.9594	7.07101e-07	1.75103e-05
EFCC1	10.5487	-7.45448	1.50453	-4.95468	7.245e-07	1.79181e-05
UTP20	412.741	1.18245	0.238756	4.95255	7.32467e-07	1.80919e-05
FREM1	170.387	-2.48001	0.500877	-4.95135	7.37016e-07	1.8181e-05
LINC02588	68.1172	-2.9274	0.591565	-4.94857	7.47597e-07	1.84184e-05
CYP7B1	344.551	-2.59216	0.523994	-4.94693	7.53924e-07	1.85506e-05
H1-0	737.692	-2.29044	0.463251	-4.94427	7.64296e-07	1.87818e-05
BCAT1	1559.1	1.61663	0.327045	4.94314	7.68745e-07	1.88671e-05
NIBAN1	109.17	2.96285	0.599702	4.94055	7.79036e-07	1.90953e-05
LOC112268050	86.7442	2.83891	0.574656	4.94018	7.80496e-07	1.91068e-05
FAM222A-AS1	18.9354	-5.43225	1.0997	-4.93975	7.82223e-07	1.91248e-05
SPOCK2	401.774	-2.52905	0.512062	-4.93895	7.85445e-07	1.91658e-05
ST14	34.506	4.03762	0.817525	4.93884	7.85892e-07	1.91658e-05
PTBP3	579.037	1.49461	0.302684	4.93787	7.89808e-07	1.9237e-05
HOOK2	91.8792	1.94303	0.393634	4.93612	7.96907e-07	1.93854e-05
NME5	33.3343	-3.92649	0.795939	-4.93315	8.09129e-07	1.96579e-05
CAMK2D	1036.47	-1.8281	0.370699	-4.9315	8.15999e-07	1.97998e-05
FRMD4B	965.305	-2.14215	0.434542	-4.92968	8.23634e-07	1.99599e-05
CACNB3	84.8211	-1.96154	0.397925	-4.92941	8.2478e-07	1.99626e-05
VWDE	73.8626	3.26738	0.663029	4.92796	8.30946e-07	2.00866e-05
LOC107985647	8.21056	7.72235	1.56752	4.92649	8.37191e-07	2.02122e-05
NPR2	225.563	-1.65564	0.336219	-4.92429	8.46686e-07	2.04158e-05
ADGRG1	65.5546	-3.42932	0.6965	-4.92365	8.49443e-07	2.04567e-05
LOC105375710	15.759	6.20113	1.26099	4.91766	8.75839e-07	2.10661e-05
RTN1	661.934	-1.99284	0.405574	-4.91363	8.94049e-07	2.14621e-05
SLCO1B1	41.002	-3.73771	0.760698	-4.91353	8.94532e-07	2.14621e-05
RPS4Y1	434.249	1.0518	0.214095	4.91278	8.9795e-07	2.15173e-05
RABL2A	84.5888	-2.14655	0.436961	-4.91245	8.99435e-07	2.15261e-05
VIM	1375.63	-2.41818	0.492317	-4.91183	9.02316e-07	2.15683e-05
C3orf67	196.906	-2.15381	0.438894	-4.90735	9.23129e-07	2.20384e-05
ALDH5A1	132.747	-1.71397	0.349298	-4.90689	9.2533e-07	2.20636e-05
ARL4C	273.476	-1.95973	0.399415	-4.9065	9.27152e-07	2.2073e-05
GPR162	84.2466	-2.44386	0.498104	-4.90632	9.28016e-07	2.2073e-05
LOC100130691	263.995	-1.89728	0.386731	-4.90595	9.29738e-07	2.20867e-05
TNS3	735.238	-2.09861	0.427844	-4.90507	9.33937e-07	2.21592e-05
NPR1	29.0472	4.45992	0.909312	4.90472	9.35602e-07	2.21714e-05
CARD10	65.58	-2.22616	0.45416	-4.90171	9.50057e-07	2.24416e-05
CFAP44	145.473	-2.48291	0.50654	-4.90171	9.50077e-07	2.24416e-05
GPR153	153.985	-2.00521	0.409091	-4.90162	9.50499e-07	2.24416e-05
PIP4P2	185.113	1.82717	0.372859	4.90044	9.56228e-07	2.25492e-05
GARS-DT	183.356	-1.76734	0.360674	-4.90009	9.57923e-07	2.25616e-05
DDI2	259.074	1.3841	0.282599	4.89774	9.6945e-07	2.28051e-05
LOC101927314	86.2587	-2.8892	0.590029	-4.89671	9.74542e-07	2.28569e-05
YAF2	385.1	-1.9019	0.388406	-4.89667	9.74723e-07	2.28569e-05
NHLH1	125.193	-4.32285	0.882853	-4.89646	9.75804e-07	2.28569e-05
LOC105373576	33.068	-6.57086	1.342	-4.89634	9.76394e-07	2.28569e-05
LHFPL4	102.217	2.54313	0.519707	4.89339	9.91115e-07	2.31733e-05
LINC02231	12.4418	5.20612	1.06426	4.89177	9.99333e-07	2.33371e-05
SNTG1	1309.28	2.11382	0.432285	4.88989	1.00893e-06	2.35328e-05
ARID5B	157.825	-2.67676	0.54783	-4.88612	1.02842e-06	2.39392e-05
JAM2	209.296	-1.91932	0.392818	-4.88604	1.02884e-06	2.39392e-05
PBX4	49.5091	-2.74507	0.562526	-4.87989	1.06145e-06	2.46681e-05
SCN9A	126.182	2.83233	0.580532	4.87885	1.06705e-06	2.47683e-05
LOC107986945	60.4432	-2.68425	0.550344	-4.87739	1.07497e-06	2.48982e-05
DDX21	797.848	2.31876	0.475415	4.87735	1.07523e-06	2.48982e-05
CRYBG1	39.9706	4.2699	0.876005	4.87428	1.09203e-06	2.52413e-05
ETS2	111.998	2.23815	0.459186	4.87417	1.09266e-06	2.52413e-05
ZNF480	341.65	1.84526	0.37866	4.87313	1.09843e-06	2.53441e-05
SYNE1	408.076	-1.87999	0.385815	-4.87276	1.10048e-06	2.53611e-05
FYN	1690.93	-1.77244	0.363781	-4.87226	1.10328e-06	2.53953e-05
NTNG1	528.241	2.5363	0.520654	4.87137	1.10829e-06	2.54801e-05
LOC100130207	57.6294	-2.84268	0.58364	-4.8706	1.11261e-06	2.5549e-05
LINC01945	22.3039	-3.9797	0.817191	-4.86997	1.11613e-06	2.55992e-05
VCL	1341.04	1.53516	0.3153	4.8689	1.12221e-06	2.57081e-05
ST6GAL1	631.365	1.59948	0.328673	4.86648	1.13601e-06	2.5964e-05
NALCN	334.967	-3.07067	0.630984	-4.86647	1.13608e-06	2.5964e-05
PAX3	50.2076	-4.22039	0.867361	-4.86577	1.14009e-06	2.60249e-05
IGFBPL1	1403.83	-2.2528	0.463109	-4.86451	1.14742e-06	2.61611e-05
TNFRSF8	42.7055	4.9216	1.01196	4.86343	1.1537e-06	2.62733e-05
CD47	364.444	-1.56482	0.321901	-4.86119	1.16681e-06	2.65405e-05
PRDM1	43.502	-3.79139	0.78093	-4.85496	1.2041e-06	2.73471e-05
MIR4500HG	117.844	-3.96027	0.815745	-4.8548	1.20511e-06	2.73471e-05
SULF2	842.646	-1.8265	0.376247	-4.85451	1.20682e-06	2.73536e-05
SNHG26	58.3614	2.32978	0.480121	4.85249	1.21918e-06	2.76014e-05
LOC105374659	17.7483	-7.69646	1.58684	-4.85017	1.23356e-06	2.78941e-05
LINC02082	56.5981	-3.64381	0.751486	-4.84881	1.24203e-06	2.80526e-05
C14orf132	353.354	1.78782	0.368907	4.84625	1.25819e-06	2.83845e-05
MBP	54.7182	2.80126	0.578169	4.84505	1.26578e-06	2.85222e-05
LRIG3	206.491	-2.04126	0.421337	-4.84471	1.268e-06	2.85388e-05
SYNPO2	57.781	3.45962	0.71429	4.84344	1.27611e-06	2.86878e-05
EYS	268.698	-2.32104	0.47944	-4.84115	1.29092e-06	2.8987e-05
SOX21-AS1	63.0182	-2.66863	0.551529	-4.83861	1.3075e-06	2.93251e-05
LOC105373815	87.8363	-3.38911	0.700581	-4.83758	1.31431e-06	2.94436e-05
ZBTB3	47.4278	2.2105	0.457281	4.834	1.33814e-06	2.99426e-05
FKBP9	174.299	-1.8608	0.384964	-4.8337	1.34018e-06	2.99535e-05
TRMT9B	89.5434	-3.14519	0.651496	-4.82763	1.38165e-06	3.08445e-05
LUZP2	225.729	2.44769	0.507055	4.82727	1.38419e-06	3.08656e-05
SYN2	160.95	2.15312	0.446087	4.82669	1.3882e-06	3.09191e-05
GPRIN3	81.7445	3.03655	0.629172	4.82627	1.39113e-06	3.09487e-05
WDR19	340.381	-1.24001	0.257107	-4.82293	1.41461e-06	3.14164e-05
SAMD3	67.6657	2.18685	0.453438	4.82282	1.41542e-06	3.14164e-05
LINC01900	16.4295	-7.96564	1.65233	-4.82084	1.42956e-06	3.16939e-05
C10orf82	15.8285	4.95733	1.02851	4.81992	1.43615e-06	3.18034e-05
APBA2	47.2607	-2.78704	0.578411	-4.81845	1.4468e-06	3.19863e-05
RGMB	959.324	-1.93932	0.402488	-4.81832	1.44774e-06	3.19863e-05
LARS1	738.615	1.03246	0.214303	4.81774	1.45193e-06	3.20423e-05
UNC5B	168.903	2.48934	0.517138	4.81369	1.4817e-06	3.26619e-05
LINC01194	399.286	10.3179	2.14356	4.81344	1.48357e-06	3.26656e-05
DDIT4	78.3852	-2.88803	0.600147	-4.81221	1.49269e-06	3.28289e-05
SESN1	251.757	-1.2637	0.262643	-4.81149	1.49808e-06	3.291e-05
PRRT2	180.978	-2.12887	0.442492	-4.81109	1.50108e-06	3.29384e-05
C6orf141	22.6506	4.12789	0.858239	4.80972	1.5114e-06	3.31271e-05
LOC105376607	74.9966	-6.22133	1.29394	-4.80807	1.52395e-06	3.33641e-05
RPH3AL-2	21.3428	-6.36267	1.32431	-4.80452	1.5512e-06	3.39222e-05
GLCE	305.988	1.1293	0.235075	4.804	1.55524e-06	3.39719e-05
ZFPM2	218.611	-2.42936	0.505752	-4.80346	1.55946e-06	3.40255e-05
TCTN1	154.113	-1.60532	0.334324	-4.80168	1.57338e-06	3.42903e-05
KIAA0825	563.643	2.07442	0.432286	4.79872	1.5968e-06	3.47615e-05
HERC3	131.591	-1.70154	0.354632	-4.79803	1.60236e-06	3.48433e-05
MECOM	553.71	-3.31543	0.691136	-4.79707	1.61005e-06	3.4971e-05
ZBTB17	172.075	-1.46983	0.306715	-4.79215	1.65005e-06	3.57993e-05
SENP7	728.089	-1.5135	0.316098	-4.78805	1.68406e-06	3.64963e-05
PGPEP1	84.9292	1.90042	0.397169	4.78493	1.71049e-06	3.70193e-05
ABCC4	521.425	-1.91383	0.399986	-4.78475	1.71204e-06	3.70193e-05
CNTNAP3B	178.657	-2.01994	0.422443	-4.78157	1.73929e-06	3.75662e-05
RYR3	190.726	-1.71133	0.358216	-4.77738	1.7759e-06	3.8314e-05
LOC107987011	58.0957	-3.93333	0.823729	-4.77503	1.79676e-06	3.87208e-05
CYTOR	45.3264	3.05793	0.640833	4.77181	1.82582e-06	3.93031e-05
SEC24D	223.964	1.77676	0.372568	4.76895	1.85192e-06	3.98204e-05
FAM122C	52.0195	-2.08303	0.436843	-4.76837	1.85725e-06	3.98905e-05
RBFOX1	705.308	2.23417	0.468574	4.76801	1.8605e-06	3.99159e-05
CELSR1	887.451	-2.43372	0.510467	-4.76763	1.86402e-06	3.99169e-05
BEND4	161.268	1.94298	0.407545	4.76752	1.86504e-06	3.99169e-05
RFX3-AS1	81.2001	-2.38593	0.500473	-4.76734	1.86677e-06	3.99169e-05
LINC02540	210.882	6.88039	1.44351	4.76642	1.87529e-06	4.00547e-05
CDKN1A	145.208	-3.73728	0.784191	-4.76578	1.88124e-06	4.01372e-05
LINC00535	88.2765	-3.2759	0.687415	-4.76553	1.88359e-06	4.01431e-05
AP1M2	20.1215	4.85629	1.01929	4.76437	1.89442e-06	4.03292e-05
DMD	711.01	-1.96007	0.411724	-4.76063	1.92985e-06	4.1038e-05
ANK2	4874.11	1.75831	0.369446	4.75932	1.94248e-06	4.12612e-05
LOC105378787	11.1959	-6.92291	1.45587	-4.75516	1.98293e-06	4.20485e-05
ARID3B	528.696	1.25025	0.262932	4.75506	1.98391e-06	4.20485e-05
DTNA	836.063	2.2577	0.475373	4.74933	2.04089e-06	4.32087e-05
LINC01594	13.7987	-7.71785	1.62558	-4.74776	2.05684e-06	4.34985e-05
TMEM62	108.886	-1.76976	0.372874	-4.74625	2.07218e-06	4.37747e-05
FUT1	24.7651	3.3523	0.706507	4.74489	2.08616e-06	4.40219e-05
BMP3	50.9356	-5.58953	1.17819	-4.74418	2.09356e-06	4.41297e-05
HHIPL1	78.3524	-2.60439	0.549083	-4.74316	2.10411e-06	4.43035e-05
ROBO2	3761.1	2.47283	0.521714	4.73981	2.13914e-06	4.49919e-05
NR2C1	381.012	-1.05247	0.22235	-4.73342	2.20765e-06	4.63559e-05
ST8SIA4	185.112	-2.62588	0.554766	-4.73332	2.2088e-06	4.63559e-05
CLGN	101.275	-1.90913	0.403654	-4.72961	2.24948e-06	4.71582e-05
SLC2A1	2712.62	-2.27679	0.48143	-4.72922	2.25383e-06	4.71981e-05
PIK3C2A	955.255	1.42968	0.302617	4.72437	2.30828e-06	4.82859e-05
LOC101928868	11.3722	-5.30159	1.12292	-4.72127	2.34382e-06	4.89761e-05
TENM4	3838.36	-1.84531	0.390995	-4.71952	2.36398e-06	4.9344e-05
MAP7	365.242	2.79476	0.592681	4.71545	2.41181e-06	5.02878e-05
HEG1	426.025	-1.7706	0.375755	-4.71212	2.45147e-06	5.10595e-05
CYP19A1	97.958	-3.85083	0.817355	-4.71133	2.46111e-06	5.12049e-05
IMPG2	98.0133	-2.68855	0.571189	-4.70693	2.51477e-06	5.22232e-05
PSD3	2169.04	-1.6765	0.356181	-4.70687	2.51548e-06	5.22232e-05
CREB5	449.354	-2.03358	0.432222	-4.70494	2.53937e-06	5.26625e-05
LINC01707	60.8493	-3.50404	0.744979	-4.70355	2.55679e-06	5.29669e-05
LOC101928923	64.9271	2.57826	0.548266	4.70257	2.56905e-06	5.31635e-05
MOXD1	536.576	-2.92162	0.621562	-4.70045	2.59595e-06	5.36626e-05
LINC01995	7.08247	-6.69747	1.42559	-4.69803	2.62689e-06	5.42439e-05
TRIB1	171.602	2.35936	0.502268	4.69741	2.63481e-06	5.43493e-05
LHFPL3-AS2	15.0626	-7.5365	1.60511	-4.69533	2.66183e-06	5.48479e-05
TMEM88	64.8904	-2.97784	0.634306	-4.69464	2.67079e-06	5.49737e-05
SLC44A3	160.819	-2.72783	0.581355	-4.69219	2.70292e-06	5.55758e-05
EYA4	37.7177	-3.29373	0.702354	-4.68956	2.73799e-06	5.61932e-05
SMPD1	83.7154	-3.21671	0.685979	-4.68922	2.74244e-06	5.61932e-05
PTPN3	75.6925	-2.57063	0.548205	-4.68917	2.74311e-06	5.61932e-05
LOC101930026	22.7057	-6.27054	1.33727	-4.68906	2.74462e-06	5.61932e-05
PLA2G12A	110.021	1.4933	0.318535	4.68802	2.7586e-06	5.64148e-05
NBPF20	32.7076	-3.19981	0.682588	-4.68776	2.76216e-06	5.64148e-05
ENO3	31.0049	-2.74996	0.586646	-4.6876	2.76423e-06	5.64148e-05
NPTXR	116.312	-2.14362	0.457595	-4.68452	2.80612e-06	5.72092e-05
PACRG	212.017	-2.93486	0.626625	-4.6836	2.81877e-06	5.73434e-05
FBXO10	276.604	-1.30189	0.277968	-4.68358	2.81905e-06	5.73434e-05
YWHAH	747.959	1.63719	0.349575	4.68338	2.82182e-06	5.73434e-05
SEMA5B	552.652	-1.73231	0.3699	-4.68318	2.82461e-06	5.73434e-05
RGS12	448.172	-1.51728	0.324158	-4.68067	2.85933e-06	5.79872e-05
COTL1	1173.25	-1.68092	0.359504	-4.67568	2.92988e-06	5.93517e-05
EBF3	377.739	-2.39253	0.51172	-4.67547	2.93277e-06	5.93517e-05
LOC112268106	61.474	-2.56887	0.549744	-4.67285	2.97043e-06	6.00506e-05
NPHP1	81.4427	-2.37181	0.507811	-4.67065	3.00242e-06	6.06257e-05
SLC16A3	33.0989	-5.34388	1.14419	-4.67047	3.00517e-06	6.06257e-05
CBFA2T3	51.3295	-2.81626	0.603069	-4.66988	3.01371e-06	6.07344e-05
RAB27B	147.147	-2.68027	0.574287	-4.66713	3.05441e-06	6.14903e-05
MACC1	51.8611	3.74284	0.802132	4.66611	3.06948e-06	6.16656e-05
LOC101928499	85.25	4.09951	0.878571	4.66611	3.06952e-06	6.16656e-05
ZNF724	225.179	1.64206	0.352067	4.66404	3.10058e-06	6.22247e-05
FOXP2	522.597	-1.82055	0.390372	-4.66362	3.10693e-06	6.22873e-05
LOC107986098	57.515	-3.6228	0.777885	-4.65725	3.20466e-06	6.41798e-05
JUP	240.623	1.48589	0.31907	4.65693	3.20966e-06	6.42132e-05
DRC3	57.6078	-2.13774	0.459095	-4.65643	3.21741e-06	6.43014e-05
LOC107987104	21.0874	3.99692	0.858761	4.65429	3.25099e-06	6.49052e-05
APOBEC3F	48.6102	-2.56712	0.5517	-4.65311	3.26973e-06	6.52118e-05
NEURL1	44.9741	-3.96048	0.851811	-4.64948	3.32766e-06	6.62985e-05
KITLG	123.492	-2.1673	0.466782	-4.64306	3.43284e-06	6.83235e-05
WDR13	251.323	-1.4691	0.316551	-4.64097	3.46785e-06	6.8949e-05
VDAC1	398.433	1.32731	0.286027	4.64051	3.47547e-06	6.90292e-05
KIAA1324	51.5857	-2.78539	0.600291	-4.64007	3.48293e-06	6.91061e-05
LOC105370027	54.9674	-5.1244	1.10451	-4.63953	3.49208e-06	6.91734e-05
ABCG1	84.3873	3.22638	0.695424	4.63944	3.4935e-06	6.91734e-05
STIM1	336.823	-1.83442	0.395427	-4.63909	3.49942e-06	6.92195e-05
ZFPM2-AS1	62.0403	-4.72447	1.01918	-4.63554	3.56008e-06	7.03471e-05
SYCP2L	64.9231	-2.51973	0.54368	-4.63459	3.57639e-06	7.0597e-05
LOC105377862	201.052	2.52128	0.544045	4.63433	3.58099e-06	7.06155e-05
CAMK2A	39.3751	-3.98661	0.860949	-4.63048	3.64816e-06	7.18666e-05
PDE7B	66.359	-4.30792	0.930986	-4.62727	3.70523e-06	7.29161e-05
SLC7A14-AS1	50.8023	-4.96546	1.07337	-4.62603	3.72735e-06	7.32766e-05
LOC107986890	7.29663	7.49447	1.62157	4.62175	3.80518e-06	7.47304e-05
LRMDA	608.404	-2.79274	0.604856	-4.61719	3.88967e-06	7.6312e-05
ETS1	53.5454	3.09261	0.670218	4.61433	3.94356e-06	7.72906e-05
PTN	402.972	-1.90316	0.412608	-4.6125	3.97847e-06	7.78956e-05
CRTAC1	94.4927	-2.58647	0.560816	-4.61198	3.98861e-06	7.80147e-05
WASF3	507.687	-2.10796	0.457402	-4.60854	4.0551e-06	7.92349e-05
GRIK1	438.443	-2.27642	0.494511	-4.60337	4.15714e-06	8.11463e-05
MORN1	179.555	-1.50357	0.326663	-4.60282	4.16802e-06	8.12764e-05
CCDC7	285.153	-1.78305	0.387516	-4.60123	4.20013e-06	8.18196e-05
LOC441204	115.951	-2.45542	0.533724	-4.60055	4.21372e-06	8.20015e-05
CTNNA3	460.066	-2.28894	0.49759	-4.60005	4.22396e-06	8.21178e-05
LINC00632	216.073	-2.95184	0.642117	-4.59705	4.28515e-06	8.32234e-05
SYT14	653.309	1.55161	0.337564	4.5965	4.29647e-06	8.33572e-05
LOC107987108	23.1925	-4.21223	0.91644	-4.5963	4.30069e-06	8.33572e-05
LOC105379005	183.686	-2.33509	0.508313	-4.59381	4.35229e-06	8.42725e-05
CDON	505.753	-1.84685	0.402142	-4.59253	4.37897e-06	8.4704e-05
LINC01090	32.7036	3.1243	0.68053	4.59098	4.4117e-06	8.52516e-05
TTC3	1970.53	-1.24739	0.27192	-4.58736	4.48888e-06	8.66561e-05
LOC105375153	59.9787	-2.39256	0.521738	-4.58575	4.5235e-06	8.7237e-05
TRDN	58.3536	4.32049	0.942362	4.58474	4.54545e-06	8.74942e-05
KCNC1	119.471	-2.89647	0.631772	-4.58468	4.54689e-06	8.74942e-05
NID2	201.72	-2.62072	0.571647	-4.58451	4.55046e-06	8.74942e-05
LINC00342	328.498	-1.99863	0.436317	-4.58068	4.63458e-06	8.90228e-05
PCSK2	410.911	-3.70103	0.808091	-4.57996	4.65061e-06	8.9198e-05
LOC440896	15.9604	-6.31757	1.37942	-4.57986	4.65296e-06	8.9198e-05
STAU1	600.86	0.868329	0.189776	4.57555	4.74963e-06	9.09607e-05
CA11	105.348	1.65448	0.361639	4.57496	4.76312e-06	9.11284e-05
TPPP3	117.586	-5.46057	1.19443	-4.5717	4.83786e-06	9.24665e-05
FGF2	332.112	1.51946	0.332387	4.57137	4.84541e-06	9.2519e-05
SLC37A1	211.56	1.31614	0.2884	4.5636	5.02841e-06	9.59181e-05
EBF4	113.417	-2.85036	0.624627	-4.5633	5.0356e-06	9.59603e-05
ZSCAN10	183.249	6.93394	1.52098	4.55886	5.14312e-06	9.79124e-05
MAPK11	82.5997	-4.32131	0.94895	-4.55378	5.26893e-06	0.000100208
MBD6	89.9004	-1.66311	0.365865	-4.54569	5.47548e-06	0.000104034
SORCS3	1647.9	-2.81891	0.62047	-4.54318	5.5413e-06	0.000105181
NR2F2-AS1	250.776	-7.88036	1.73548	-4.54075	5.60549e-06	0.000106295
TTC13	179.363	-1.11636	0.245873	-4.54039	5.6151e-06	0.000106328
CXXC4	545.191	-1.31656	0.289975	-4.54027	5.61826e-06	0.000106328
CD2AP	668.941	1.20565	0.265578	4.53972	5.63291e-06	0.0001065
DIAPH1	492.048	0.873165	0.192456	4.53695	5.70738e-06	0.000107802
PDZD4	299.666	2.2573	0.497607	4.53632	5.72448e-06	0.000108019
CNRIP1	62.7542	-2.77105	0.611206	-4.53374	5.79471e-06	0.000109238
TMCO4	26.3176	2.46975	0.544887	4.53259	5.82662e-06	0.000109732
MOK	131.335	-2.23094	0.49249	-4.52992	5.90066e-06	0.000111018
PLK3	94.7316	-2.42092	0.534846	-4.52638	6.00018e-06	0.00011278
MTCL1	391.968	1.10632	0.244461	4.52553	6.0244e-06	0.000113125
SERPINB4	8.29952	7.73839	1.7102	4.52485	6.04397e-06	0.000113382
DSCAM	825.065	-2.16877	0.479335	-4.52454	6.05258e-06	0.000113433
ZNF441	114.863	-2.43276	0.537775	-4.52374	6.07571e-06	0.000113756
CCDC18-AS1	160.807	-1.78292	0.394151	-4.52346	6.08374e-06	0.000113795
FBLN2	86.409	-2.72354	0.602183	-4.52279	6.10307e-06	0.000114046
ZDHHC23	32.262	3.04316	0.672891	4.52251	6.11114e-06	0.000114086
TTLL9	50.3891	-3.03691	0.672231	-4.51766	6.25267e-06	0.000116616
TFE3	134.389	1.78689	0.39587	4.51383	6.36665e-06	0.000118627
LOC112268189	11.6147	-6.49261	1.43872	-4.51278	6.39849e-06	0.000119102
SHISA3	85.8594	5.06038	1.1214	4.51257	6.40455e-06	0.000119102
SMTNL2	16.3812	-4.83557	1.07235	-4.50933	6.50335e-06	0.000120823
LOC112267883	18.6406	3.04362	0.675055	4.5087	6.52247e-06	0.000121062
AATK	77.1013	-2.58378	0.57311	-4.50835	6.53347e-06	0.000121149
GTF2E1	218.998	1.68669	0.374192	4.50755	6.5582e-06	0.000121491
FGF17	26.0747	-5.48977	1.21819	-4.5065	6.59066e-06	0.000121879
ITGA3	134.316	2.2937	0.508981	4.50646	6.59181e-06	0.000121879
LOC105378308	13.3572	5.86093	1.30077	4.50575	6.614e-06	0.000122172
LINC01250	73.3659	-3.18198	0.706405	-4.50446	6.65405e-06	0.000122794
NOD1	93.0396	-1.52172	0.33785	-4.50411	6.66507e-06	0.00012288
SLC6A16	133.583	-1.83063	0.406836	-4.49968	6.8057e-06	0.000125352
PPP3CA	755.654	1.77934	0.395545	4.49846	6.84471e-06	0.00012595
ATP10D	153.358	-2.43248	0.540764	-4.49823	6.85214e-06	0.000125967
ACSL6	58.5631	3.79822	0.84512	4.4943	6.97993e-06	0.000128194
LINC01994	12.7464	-7.36223	1.63859	-4.49303	7.02175e-06	0.000128839
ENPEP	141.886	-2.54832	0.567282	-4.49215	7.0507e-06	0.000129247
DLL1-2	17.5192	-6.20687	1.38254	-4.48946	7.14038e-06	0.000130767
CRTC3	132.391	-2.17855	0.4853	-4.48907	7.15344e-06	0.000130881
HDAC6	361.872	-1.3115	0.29217	-4.48884	7.16113e-06	0.000130898
RSPO4	40.3388	2.62129	0.584061	4.48805	7.18792e-06	0.000131263
BBS5	60.6048	-2.40618	0.536326	-4.48641	7.24323e-06	0.000132148
ANKRD36B	261.183	-1.35423	0.3019	-4.48569	7.26797e-06	0.000132474
CDC42EP4	156.505	-1.79608	0.400858	-4.4806	7.44338e-06	0.000135543
PKN2-AS1	47.9904	-2.25852	0.504166	-4.47972	7.47402e-06	0.000135972
ICA1	168.08	1.82561	0.407582	4.47912	7.49504e-06	0.000136226
CACNA1B	655.072	1.8346	0.409643	4.47852	7.51606e-06	0.000136479
HNF1B	13.8826	-7.07441	1.58098	-4.47471	7.65168e-06	0.000138811
CNR1	1027.2	-2.81817	0.630206	-4.47183	7.75542e-06	0.00014052
LINC00941	14.6897	4.1632	0.931014	4.47169	7.76046e-06	0.00014052
SYT13	64.9861	2.14867	0.480804	4.4689	7.86219e-06	0.000142228
LOC105370025	23.3903	-7.58429	1.69727	-4.46854	7.8757e-06	0.000142339
ADCY6	148.66	-1.89273	0.42364	-4.46779	7.90328e-06	0.000142703
CSGALNACT1	81.688	-2.48137	0.555587	-4.46622	7.96133e-06	0.000143617
ACAA2	189.057	1.74153	0.39009	4.46442	8.02873e-06	0.000144591
PEX5L	278.932	2.01782	0.451983	4.46437	8.0304e-06	0.000144591
INTS13	164.521	1.39935	0.313461	4.46417	8.03785e-06	0.000144591
TEC	41.9465	3.20705	0.719047	4.46014	8.19056e-06	0.000147201
LRP1B	2771.24	-1.58306	0.355051	-4.45869	8.24621e-06	0.000148063
KCNJ12	138.925	-3.3507	0.751578	-4.45821	8.26454e-06	0.000148254
LINC01197	17.2259	-6.94257	1.55769	-4.45696	8.31307e-06	0.000148986
ASRGL1	223.676	-1.55755	0.349575	-4.45555	8.3679e-06	0.000149829
KCMF1	485.235	1.22088	0.274033	4.45522	8.38065e-06	0.000149918
C5orf46	56.5499	4.10337	0.921332	4.45374	8.43868e-06	0.000150816
CCDC191	83.8351	-2.72535	0.612242	-4.45143	8.52991e-06	0.000152188
PRDM8	444.408	-5.79502	1.30184	-4.4514	8.53127e-06	0.000152188
SPATA13	1110.57	-1.67988	0.377418	-4.45099	8.54771e-06	0.000152341
MTAP	558.631	0.996885	0.224008	4.45022	8.57828e-06	0.000152744
TSC22D3	55.6465	-2.45283	0.551355	-4.44873	8.63814e-06	0.000153668
SNCA	272.991	-1.63448	0.367742	-4.44463	8.80425e-06	0.000156478
IFT88	274.781	-1.61076	0.362741	-4.44052	8.97413e-06	0.000159351
RRBP1	360.533	1.34549	0.303436	4.43419	9.24175e-06	0.000163952
SYNE2	1220.6	-0.9885	0.222963	-4.43348	9.27245e-06	0.000164345
OLFM2	106.494	1.79581	0.405086	4.43316	9.28615e-06	0.000164437
GABRA5	58.6595	3.61995	0.816817	4.43178	9.34589e-06	0.000165342
SLC38A1	2529.36	1.18894	0.26833	4.43089	9.38469e-06	0.000165877
WNT5A	677.794	-2.01641	0.455135	-4.43037	9.40726e-06	0.000166118
SLC2A3	656.654	2.20646	0.498053	4.43018	9.41558e-06	0.000166118
CASC2	158.513	-2.0568	0.464407	-4.42888	9.47249e-06	0.000166969
ERICH3	18.2107	-6.6067	1.49189	-4.42841	9.49319e-06	0.000167181
ZNF850	259.708	1.51349	0.341833	4.42758	9.52943e-06	0.000167666
XRCC2	291.293	1.38625	0.31318	4.42636	9.58353e-06	0.000168464
SH2D3A	19.0159	3.5609	0.80479	4.42463	9.66078e-06	0.000169575
RB1CC1	688.874	1.20131	0.27151	4.42455	9.66435e-06	0.000169575
MEIS1-AS3	76.6754	-5.60366	1.26708	-4.42249	9.75704e-06	0.000171046
MFGE8	284.458	2.55795	0.57852	4.42154	9.8e-06	0.000171643
TMEM167A	609.875	1.76058	0.398278	4.42048	9.84809e-06	0.000172328
LRP8	733.788	1.56304	0.353629	4.42	9.87009e-06	0.000172556
SLC44A1	352.673	1.20002	0.271519	4.41966	9.88541e-06	0.000172667
GSTA4	197.456	-1.50213	0.340107	-4.41663	1.0025e-05	0.000174947
RBPMS	1005.47	1.73699	0.393393	4.41541	1.00816e-05	0.000175776
PURPL	152.474	-2.58403	0.585965	-4.40986	1.03436e-05	0.000180158
ZSCAN1	38.4273	-4.00018	0.907133	-4.40969	1.03516e-05	0.000180158
LINC02762	73.8242	-2.37642	0.539195	-4.40734	1.04648e-05	0.000181962
CCDC192	110.17	-1.74793	0.396817	-4.40486	1.0585e-05	0.000183887
JAKMIP1	81.2365	2.10142	0.477212	4.40354	1.06497e-05	0.000184831
GAB2	544.19	-2.11392	0.48007	-4.40336	1.06585e-05	0.000184831
FHOD3	1475.07	-2.03767	0.462798	-4.40294	1.06793e-05	0.000185024
TRIM24	1518.32	1.24838	0.283588	4.4021	1.07206e-05	0.000185573
HABP4	185.521	-1.28614	0.292216	-4.40134	1.07586e-05	0.000186065
LINC02664	36.2042	-3.86476	0.878542	-4.39906	1.0872e-05	0.000187857
SLC4A8	494.004	-1.13919	0.259103	-4.39668	1.09921e-05	0.000189762
CDH12	762.544	-2.47625	0.563356	-4.39554	1.105e-05	0.00019059
LOC105371275	17.0412	-6.40093	1.4569	-4.39352	1.11527e-05	0.00019219
RNMT	329.527	1.05504	0.240321	4.39015	1.13274e-05	0.000195025
TNR	290.937	-3.45658	0.78744	-4.38964	1.13537e-05	0.000195304
LOC107984737	47.8388	3.13807	0.715511	4.38578	1.1557e-05	0.000198617
SYNCRIP	1234.1	1.13501	0.25881	4.38549	1.15725e-05	0.000198617
SLC14A2	47.5613	-3.61985	0.825433	-4.3854	1.15772e-05	0.000198617
RPF2	129.367	1.40224	0.319776	4.38505	1.15959e-05	0.000198761
LOC105370783	22.1274	-6.03523	1.37691	-4.38316	1.16969e-05	0.000200313
ADAMTS18	39.5075	-2.96912	0.677569	-4.38202	1.17583e-05	0.000201185
ADAMTS8	40.3548	3.50915	0.800897	4.38152	1.17855e-05	0.000201472
LOC107984787	13.6783	-6.72809	1.53582	-4.38078	1.18257e-05	0.00020198
JAG1	1855.24	-2.35891	0.538665	-4.37917	1.19131e-05	0.000203292
NEUROD1	208.51	-5.71071	1.30446	-4.37783	1.19865e-05	0.000204365
WDTC1	111.332	-1.55245	0.354658	-4.37731	1.20151e-05	0.00020467
SLC8A3	109.621	-2.49406	0.569863	-4.37659	1.2055e-05	0.000205167
TLE4	1280.11	-1.71481	0.391831	-4.3764	1.20655e-05	0.000205167
TMEM164	392.666	-1.58521	0.362277	-4.37568	1.21053e-05	0.000205661
GCLM	94.1438	1.58232	0.361863	4.37272	1.22707e-05	0.000208288
SLC6A12	21.9349	-5.34553	1.22262	-4.37221	1.22998e-05	0.000208598
OR51B5	53.8126	-2.92292	0.668636	-4.37147	1.23411e-05	0.000209093
RGS8	40.321	-3.46548	0.792797	-4.37121	1.2356e-05	0.000209093
LOC105379080	363.705	-2.95281	0.675529	-4.37111	1.23615e-05	0.000209093
ZNF202	208.368	1.12448	0.257265	4.37089	1.23741e-05	0.000209122
SLCO4A1	35.8495	2.47544	0.566708	4.36811	1.25325e-05	0.000211457
ZSCAN2	77.8792	1.60582	0.367625	4.36808	1.25342e-05	0.000211457
ELAVL3	292.192	-4.75372	1.0885	-4.3672	1.25847e-05	0.000212124
IKZF2	338.099	-1.79477	0.411485	-4.36169	1.29063e-05	0.000217355
FSD1L	743.671	-1.50514	0.345186	-4.36038	1.29837e-05	0.000218459
GPR161	304.67	-1.25011	0.28671	-4.3602	1.29946e-05	0.000218459
ZSWIM5	543.436	-1.80506	0.414065	-4.35937	1.30437e-05	0.000219093
LOC105379087	21.5496	2.90231	0.665928	4.35829	1.31081e-05	0.000219983
NES	3677.79	-1.74901	0.401446	-4.35676	1.32002e-05	0.000221336
RASSF4	53.4826	-2.23591	0.513626	-4.35319	1.34169e-05	0.000224774
LOC105372130	167.541	-1.82699	0.41976	-4.35246	1.34615e-05	0.000225326
TUNAR	127.384	1.70642	0.392187	4.35103	1.35498e-05	0.000226607
TENM1	497.223	1.80835	0.415758	4.34952	1.36435e-05	0.000227928
APBB1	261.182	-1.44632	0.332535	-4.34938	1.36525e-05	0.000227928
PMM2	312.821	1.10436	0.254032	4.34732	1.37813e-05	0.000229879
LINC00862	20.7509	3.91861	0.901871	4.34498	1.39288e-05	0.000232138
LOC105376442	15.307	3.63498	0.837006	4.34283	1.40659e-05	0.000234221
ZNF488	9.90606	6.60734	1.52184	4.34167	1.41406e-05	0.000235261
STK32A	149.513	-2.81797	0.649384	-4.33945	1.42841e-05	0.000237443
ZNF195	475.926	1.11315	0.25654	4.33908	1.4308e-05	0.000237636
KCNA4	10.0423	-6.80864	1.56979	-4.3373	1.44243e-05	0.000239167
YWHAG	1119.76	1.18818	0.273945	4.33729	1.4425e-05	0.000239167
OTX2	115.335	8.19175	1.8898	4.33471	1.45952e-05	0.000241782
AKR1E2	60.4825	-1.8025	0.416004	-4.33289	1.47163e-05	0.000243578
BRINP3	301.368	-5.91104	1.36507	-4.33019	1.48979e-05	0.000246371
NAMA	24.6473	-5.99781	1.38541	-4.32926	1.49614e-05	0.00024721
GAS6	81.8505	2.38227	0.550978	4.32372	1.53417e-05	0.000253276
MFAP3L	77.053	1.66559	0.385314	4.32268	1.54146e-05	0.000254261
C20orf203	23.7916	-5.63499	1.30368	-4.32236	1.54368e-05	0.00025441
ZMIZ1	2057.72	-1.87516	0.434164	-4.31901	1.56727e-05	0.000258077
PMFBP1	146.878	-1.97838	0.458201	-4.31771	1.57653e-05	0.000259381
GCNT4	59.6469	2.5839	0.598513	4.31719	1.58027e-05	0.000259774
LOC105371953	199.559	-1.66242	0.385367	-4.31386	1.60427e-05	0.000263492
MAP1A	1005.81	-1.79747	0.416691	-4.31368	1.60562e-05	0.000263492
TRANK1	201.583	-1.9446	0.450845	-4.31322	1.60893e-05	0.000263718
VSTM2A	106.392	-3.38217	0.784161	-4.31311	1.60974e-05	0.000263718
CEP70	341.636	-1.49509	0.346931	-4.30948	1.63642e-05	0.000267861
LINC02821	32.3659	-3.66357	0.85029	-4.30861	1.64281e-05	0.000268678
DCX	2027.56	-2.29996	0.534156	-4.30579	1.66388e-05	0.000271894
ENAH	2039.73	0.894976	0.207901	4.30482	1.67123e-05	0.000272648
LOC105375180	45.5	-3.1964	0.74255	-4.30462	1.67271e-05	0.000272648
CSMD3	1058.02	-2.31778	0.538441	-4.30462	1.67274e-05	0.000272648
KLHL32	136.797	-1.92104	0.44647	-4.30273	1.68708e-05	0.000274754
SLC43A1	33.5838	2.84102	0.660537	4.30107	1.69975e-05	0.000276582
PPP1R9B	173.203	-1.51049	0.351271	-4.30006	1.70754e-05	0.000277617
TIAM1	929.497	-1.80166	0.419014	-4.29976	1.70987e-05	0.00027776
CELF6	40.9291	-3.32109	0.772773	-4.29763	1.72633e-05	0.000280198
TMTC4	739.794	-1.25415	0.292075	-4.29394	1.75528e-05	0.000284657
LOC112268446	13.6328	5.24719	1.22213	4.29347	1.75904e-05	0.000285026
MMP25	16.4142	3.09564	0.721237	4.29212	1.76974e-05	0.00028639
AMPH	320.215	-1.36624	0.318319	-4.29204	1.77042e-05	0.00028639
NEAT1	1613.69	-2.56776	0.598462	-4.29061	1.78183e-05	0.000287993
FAM160B2	101.316	-1.92299	0.448384	-4.28871	1.79715e-05	0.000290225
GABRB1	321.994	-6.38396	1.48887	-4.28779	1.80461e-05	0.000291187
HMX2	6.87613	7.01121	1.63527	4.28749	1.80702e-05	0.000291331
ZNF93	344.644	1.10425	0.257593	4.2868	1.81262e-05	0.000291989
NAA38	162.692	-1.50912	0.352065	-4.28647	1.81535e-05	0.000292185
NIP7	75.3347	1.90118	0.443693	4.2849	1.82821e-05	0.000293915
FOXO4	29.4503	3.05701	0.713457	4.28479	1.82915e-05	0.000293915
LOC107987000	39.2031	-3.55948	0.831309	-4.28177	1.85409e-05	0.000297675
POMP	128.247	1.43979	0.336552	4.27805	1.88535e-05	0.000302442
LINC01484	18.101	3.91708	0.916118	4.27573	1.9051e-05	0.000305354
RASGRF2-AS1	14.1711	5.17406	1.21099	4.27258	1.93227e-05	0.000309453
BCL11B	42.3618	2.60608	0.610155	4.27117	1.94447e-05	0.000311147
PREX2	1300.44	-1.54518	0.361896	-4.26968	1.95754e-05	0.000312979
HOOK1	128.468	1.98382	0.464692	4.2691	1.96259e-05	0.000313527
PGM5	27.6512	-5.3182	1.24598	-4.26828	1.9699e-05	0.000314433
FAM183A	61.2822	-2.68646	0.629692	-4.26632	1.98728e-05	0.000316945
LEKR1	87.2518	-2.49679	0.585301	-4.26582	1.99166e-05	0.000317381
KCNH2	149.682	-1.63685	0.383792	-4.26495	1.99951e-05	0.000318368
LOC100126447	9.31204	5.53514	1.29911	4.2607	2.03786e-05	0.000324206
KRT18	242.722	2.89781	0.68073	4.25692	2.07261e-05	0.000329463
ZNF860	29.6183	4.13913	0.973261	4.25285	2.11071e-05	0.000335242
INHBA	29.2413	6.10525	1.43581	4.25213	2.11749e-05	0.000336042
ARHGEF25	73.9647	-2.18063	0.512919	-4.25142	2.12419e-05	0.000336829
ATP6V0E2	175.988	-2.4244	0.570374	-4.25054	2.13257e-05	0.00033763
ALG9	267.332	-1.15538	0.271821	-4.25052	2.13275e-05	0.00033763
HTR2C	32.3062	3.51953	0.828176	4.24973	2.14024e-05	0.000338538
NWD2	130.4	-2.39227	0.563141	-4.24808	2.1561e-05	0.000340767
C16orf54	35.1427	3.83317	0.902607	4.24678	2.16864e-05	0.000342467
SRRM4	1383.84	-2.39188	0.563462	-4.24497	2.18622e-05	0.000344683
LINC02207	18.3414	-5.7666	1.35846	-4.24497	2.18625e-05	0.000344683
CXCR4	79.2735	-4.60448	1.08483	-4.24443	2.19147e-05	0.000345224
MEG8	1857.42	1.10642	0.260794	4.24249	2.21054e-05	0.000347944
CCDC169-SOHLH2	19.0245	-4.31257	1.01676	-4.24147	2.22061e-05	0.000349243
SLC16A2	432.531	-1.47551	0.347984	-4.24018	2.23338e-05	0.000350966
TM4SF18	10.2124	6.24932	1.47395	4.23986	2.23664e-05	0.000351191
PUS7	335.512	1.108	0.261516	4.23685	2.26679e-05	0.000355561
OTUD4	430.956	1.30049	0.306958	4.23671	2.26816e-05	0.000355561
AKIRIN1	426.06	1.29866	0.306633	4.23523	2.28316e-05	0.000357621
ARL3	166.345	-1.86453	0.440463	-4.23311	2.30483e-05	0.000360722
FEZF2	19.3301	-4.66042	1.10162	-4.23051	2.33159e-05	0.000364614
PDGFC	361.037	-1.91256	0.45228	-4.22872	2.35029e-05	0.00036724
MLXIPL	17.9162	3.7611	0.889543	4.22813	2.35644e-05	0.000367902
CSPG5	226.139	-2.318	0.548537	-4.22579	2.38103e-05	0.000371441
PIDD1	82.6098	-2.26836	0.536938	-4.22462	2.39343e-05	0.000373064
ASXL2	499.302	0.889141	0.210475	4.22444	2.39531e-05	0.000373064
SLC39A14	419.276	1.96503	0.465308	4.22306	2.41004e-05	0.000375056
KLHL7	483.911	0.879855	0.208363	4.22271	2.41379e-05	0.000375335
AGBL1	90.2547	-2.88919	0.68484	-4.21878	2.45632e-05	0.000381641
LOC105377109	31.6841	-3.23047	0.765879	-4.21799	2.46486e-05	0.000382659
TMSB4X	404.047	1.98815	0.471384	4.2177	2.46811e-05	0.000382855
AHR	64.435	2.29509	0.544423	4.21563	2.49077e-05	0.000386059
LOC107986997	153.265	-2.39455	0.568698	-4.21059	2.54708e-05	0.00039447
LFNG	103.347	-2.04927	0.486767	-4.20996	2.55418e-05	0.000395078
AMN1	58.6274	-1.94389	0.461746	-4.20988	2.55511e-05	0.000395078
CDC42EP3	363.158	1.83177	0.435441	4.20671	2.59118e-05	0.000400334
LOC107985168	40.6603	-3.77032	0.896372	-4.2062	2.59705e-05	0.00040092
CHST8	211.894	1.91428	0.455835	4.19952	2.67486e-05	0.000412601
FBXW2	434.124	0.894044	0.213006	4.19727	2.70151e-05	0.000416379
ARHGAP10	66.9386	2.19752	0.523736	4.19584	2.71858e-05	0.000418674
LOC105379051	69.4644	-2.39368	0.570526	-4.19556	2.72194e-05	0.000418857
LOC105376391	8.74345	-6.43563	1.53451	-4.19393	2.74159e-05	0.000421424
EXOC6	442.016	-1.47751	0.352308	-4.19382	2.74299e-05	0.000421424
LOC728755	531.734	-2.05635	0.490394	-4.19326	2.74968e-05	0.000422114
RAB31	90.0087	3.13065	0.746641	4.19298	2.75318e-05	0.000422315
TXNL1	253.291	1.17574	0.280668	4.18907	2.80106e-05	0.000429317
GAA	431.462	-1.80894	0.431864	-4.18867	2.80591e-05	0.000429719
CHRNA3	271.793	-2.79384	0.667174	-4.18757	2.81956e-05	0.000431467
LOC101929534	20.9158	3.69773	0.883082	4.1873	2.82299e-05	0.000431648
LINC02791	8.40269	-6.77784	1.62023	-4.18327	2.87345e-05	0.000439015
ARHGAP23-2	16.3754	3.45201	0.825313	4.18266	2.88113e-05	0.00043984
TIGIT	17.0135	-5.81357	1.38998	-4.18248	2.88345e-05	0.000439845
CD24	2107.48	2.1884	0.523261	4.18224	2.88654e-05	0.000439969
NOLC1	793.881	1.49927	0.358642	4.1804	2.90997e-05	0.000443189
APELA	77.9948	3.08295	0.7377	4.17914	2.92615e-05	0.000445301
ACTA2	71.2295	-1.97295	0.472174	-4.17845	2.93505e-05	0.000446093
LOC107986712	73.1086	-2.60895	0.624392	-4.17838	2.93598e-05	0.000446093
CCDC92B	20.8787	2.8016	0.670912	4.17581	2.96926e-05	0.000450794
SLC17A9	19.7593	3.84883	0.922296	4.1731	3.00483e-05	0.000455835
PAPSS2	59.5422	3.48271	0.834612	4.17285	3.00808e-05	0.000455969
AMBP	14.6813	-3.48079	0.834606	-4.17058	3.03821e-05	0.000460174
UBR5	1879.22	1.09983	0.263761	4.16978	3.04894e-05	0.000461436
GSN	216.451	-2.037	0.488597	-4.16908	3.05836e-05	0.000462499
ASXL1	684.494	-1.10973	0.266356	-4.16633	3.09545e-05	0.000467741
LOC105375905	21.563	-5.39676	1.29563	-4.16537	3.10848e-05	0.000469341
HS1BP3	71.8236	-1.53797	0.369269	-4.16491	3.11482e-05	0.00046993
LOC105379102	334.536	-1.70792	0.410317	-4.16243	3.1488e-05	0.000474686
PLEKHA1	537.133	-1.70735	0.410246	-4.16178	3.15781e-05	0.0004754
SETD7	198.973	-1.37033	0.329268	-4.16173	3.15848e-05	0.0004754
DENND2A	285.723	-1.59058	0.38241	-4.15936	3.19135e-05	0.000479957
KIFAP3	277.483	-1.81421	0.436194	-4.15919	3.19373e-05	0.000479957
TMEM45A	123.102	-1.92802	0.46362	-4.15862	3.20182e-05	0.000480797
CCDC112	210.569	1.23646	0.297531	4.15576	3.24212e-05	0.000486469
NAA15	858.359	1.14011	0.274375	4.15531	3.24853e-05	0.000487052
MAN2A2	232.417	-1.60539	0.386624	-4.15233	3.29104e-05	0.000493042
PAX2	74.9907	-5.50261	1.32527	-4.15207	3.29474e-05	0.000493213
SULT1C3	20.9834	-5.25214	1.26514	-4.15144	3.30389e-05	0.000494199
TWNK	68.7259	1.98706	0.478679	4.15114	3.30825e-05	0.000494467
ADAMTSL1	222.143	-1.74646	0.420926	-4.14909	3.33804e-05	0.000498533
GABRG3	191.494	-2.29267	0.5527	-4.14812	3.3521e-05	0.000500245
SASH1	703.088	-1.58247	0.381542	-4.14758	3.36013e-05	0.000501055
MYLIP	135.294	1.83112	0.441552	4.14701	3.36852e-05	0.000501917
KIFBP	261.918	1.73669	0.418881	4.14603	3.38292e-05	0.000503673
CYCS	369.056	2.10913	0.508912	4.1444	3.40701e-05	0.000506869
TMEM98	228.816	-1.47531	0.356068	-4.14335	3.42274e-05	0.000508815
URM1	276.531	-1.34847	0.325619	-4.14125	3.45422e-05	0.000513099
IQSEC2	48.5208	1.58734	0.383349	4.14073	3.46205e-05	0.000513866
NR5A2	116.053	2.67459	0.646046	4.13994	3.47402e-05	0.000515245
MYO16-2	20.0131	-5.80603	1.40275	-4.13904	3.48766e-05	0.000516872
PREP	281.761	1.27271	0.307599	4.13757	3.51004e-05	0.000519788
CLIP2	224.113	1.50086	0.362765	4.13729	3.51434e-05	0.000519853
SLC5A12	35.6679	-2.09104	0.505425	-4.13719	3.51588e-05	0.000519853
SERPING1	502.751	-2.01254	0.486823	-4.13403	3.56455e-05	0.000526645
FAM98A	147.433	1.79969	0.435379	4.13362	3.57091e-05	0.000527182
HIVEP1	779.458	1.10144	0.266473	4.1334	3.5743e-05	0.000527278
LINC02715	28.618	-6.08329	1.47186	-4.13307	3.57948e-05	0.000527638
DACT2	63.5005	4.85219	1.17421	4.13232	3.59117e-05	0.000528956
PSTPIP1	39.1838	-2.90507	0.703068	-4.13199	3.59638e-05	0.000529319
CCDC167	62.396	-2.0094	0.486494	-4.13037	3.62185e-05	0.000532344
CPXM1	557.373	-2.09828	0.508018	-4.13033	3.62246e-05	0.000532344
HPN	18.2818	3.97757	0.963231	4.1294	3.63711e-05	0.000533497
SPEF2	53.6806	-2.60103	0.629895	-4.12931	3.6385e-05	0.000533497
ZC3H6	194.058	-1.47388	0.356931	-4.12931	3.63861e-05	0.000533497
FOXB1	106.298	-4.72759	1.14524	-4.12802	3.65901e-05	0.00053608
TMEM268	59.012	1.83335	0.444334	4.12607	3.69014e-05	0.000540229
LOC101928438	333.765	-2.16221	0.52416	-4.12509	3.70591e-05	0.000542127
EPCAM-DT	201.069	-2.22196	0.538686	-4.12478	3.71085e-05	0.000542437
CHRD	105.144	-3.40081	0.825047	-4.12196	3.75657e-05	0.000548704
KBTBD8	52.1717	2.49072	0.604414	4.12089	3.77408e-05	0.000550844
SMPD3	103.275	-2.42313	0.588251	-4.1192	3.80184e-05	0.000554475
GRK4	208.298	-1.45858	0.35451	-4.11435	3.88275e-05	0.000565847
PALB2	218.87	1.10738	0.269299	4.11209	3.92089e-05	0.000570974
LINC-PINT	242.663	1.88486	0.458897	4.10736	4.00201e-05	0.000582129
LINC01797	16.2659	-5.64172	1.37359	-4.10728	4.00353e-05	0.000582129
B3GALT5	80.4186	3.57357	0.870138	4.1069	4.01e-05	0.000582629
SAV1	120.912	1.29643	0.315888	4.10409	4.05907e-05	0.000589314
RNF217	361.413	-1.62686	0.396608	-4.10193	4.09711e-05	0.00059439
ITGB5	275.328	1.69313	0.412904	4.10055	4.12177e-05	0.000597517
CACNG5	37.6486	3.61169	0.882035	4.09472	4.22671e-05	0.00061227
EPHA7	1005.61	-2.08828	0.510192	-4.09312	4.25605e-05	0.000616056
FGF10	24.4645	-5.76783	1.40927	-4.09277	4.26253e-05	0.000616531
PPL	55.4051	1.55567	0.38016	4.09215	4.2739e-05	0.000617039
CASD1	100.182	-1.54941	0.378635	-4.09209	4.27495e-05	0.000617039
BNIP3	75.9218	-2.46139	0.601505	-4.09206	4.27565e-05	0.000617039
LINC00934	23.5886	-8.34113	2.03869	-4.09142	4.28732e-05	0.00061826
LINC02860	11.1389	-6.16443	1.5068	-4.09108	4.29362e-05	0.000618706
METTL8	361.075	1.17653	0.287609	4.09071	4.30049e-05	0.000619232
CD200	406.941	1.25925	0.30792	4.08954	4.32238e-05	0.000621553
GPR155	133.456	-1.83099	0.447729	-4.0895	4.32306e-05	0.000621553
NKX6-2	13.7322	-6.789	1.66035	-4.0889	4.33415e-05	0.000622682
PRELID2	341.932	-2.12847	0.520841	-4.0866	4.37731e-05	0.000628415
LOC105372668	11.5593	-6.40668	1.56849	-4.08462	4.41492e-05	0.000633342
LOC101927025	70.0372	-3.09057	0.756751	-4.084	4.42671e-05	0.000634561
LOC112268302	95.7878	-2.35697	0.577361	-4.08231	4.45908e-05	0.000638726
LOC105377731	7.54478	-6.4001	1.56788	-4.08201	4.46471e-05	0.000639058
ALDH1B1	198.063	1.88028	0.460737	4.08103	4.48363e-05	0.00064129
CHD3	453.012	-1.4309	0.350726	-4.07983	4.50695e-05	0.000644146
LINC02466	20.7098	-4.00852	0.98269	-4.07913	4.52049e-05	0.000645603
RPL7L1	495.72	1.65218	0.40517	4.07775	4.54742e-05	0.000648967
IGDCC3	1875.98	-1.7447	0.428289	-4.07364	4.62838e-05	0.00065995
GLYAT	45.4456	-8.15261	2.00138	-4.0735	4.63123e-05	0.00065995
SPP1	125.161	4.89252	1.20145	4.07217	4.65778e-05	0.000663243
EFNA5	2405.72	-1.62053	0.398066	-4.07101	4.68094e-05	0.000666048
AARS1	352.674	1.09156	0.268208	4.06983	4.70465e-05	0.000668928
MAN2B2	115.266	-1.51019	0.37125	-4.06785	4.74489e-05	0.000674152
GPCPD1	354.427	-1.13389	0.278824	-4.06668	4.76867e-05	0.000676478
CUEDC2	118.562	-1.25926	0.309655	-4.06667	4.76891e-05	0.000676478
ATP2B4	221.473	-1.92875	0.474308	-4.06645	4.77345e-05	0.000676478
ZNF709	84.2908	-1.39037	0.341919	-4.06636	4.7753e-05	0.000676478
WNT7A	123.737	-5.15337	1.2678	-4.0648	4.80745e-05	0.000680446
LOC107985164	15.2534	-3.91802	0.963926	-4.06465	4.81038e-05	0.000680446
LOC105373703	149.914	-2.75874	0.678798	-4.06416	4.82066e-05	0.000681401
SLC6A15	274.17	2.55119	0.627867	4.06327	4.83895e-05	0.000683484
LAMC2	17.1521	4.09271	1.00736	4.06282	4.84826e-05	0.000684298
IRF6	9.89598	5.05561	1.24504	4.06061	4.89449e-05	0.000690316
INTS6L	294.847	-1.24749	0.307402	-4.05816	4.94614e-05	0.000697091
LIN28A	2845.55	1.78021	0.438757	4.0574	4.96218e-05	0.000698418
LOC105379107	100.148	-5.01546	1.23619	-4.05719	4.96675e-05	0.000698418
S100A11	97.4059	3.35983	0.828143	4.05706	4.9694e-05	0.000698418
UBALD1	38.43	3.42539	0.84431	4.05703	4.97006e-05	0.000698418
DYRK4	69.1079	-1.36583	0.337047	-4.05235	5.07051e-05	0.000712016
FGF13	2371.26	-1.90286	0.469824	-4.05017	5.11814e-05	0.000718141
MIR503HG	19.4697	-6.0036	1.48237	-4.05001	5.12159e-05	0.000718141
CYB5A	86.6845	1.54154	0.380727	4.04895	5.14488e-05	0.000720365
LINC01399	17.2119	-3.87985	0.958237	-4.04894	5.14493e-05	0.000720365
ZNF521	815.614	-1.63146	0.403028	-4.048	5.16574e-05	0.000722753
OAZ2	284.128	1.53047	0.378298	4.04568	5.21705e-05	0.00072905
LOC105374029	38.1264	4.13952	1.02321	4.04563	5.21831e-05	0.00072905
UBE2D4	76.8234	-1.71255	0.423341	-4.04531	5.22539e-05	0.00072951
HEMK1	81.3847	-1.67741	0.414705	-4.04482	5.23642e-05	0.00073037
HECW2	843.47	-1.572	0.388656	-4.04469	5.23914e-05	0.00073037
CLDN2	11.4158	-4.28903	1.06063	-4.04387	5.25763e-05	0.000732418
TARS1	495.74	1.53949	0.380733	4.04349	5.26604e-05	0.00073306
RNF213-AS1	59.7381	-2.28442	0.565102	-4.04249	5.28855e-05	0.000735662
LOC105370906	41.5673	-3.77029	0.932952	-4.04125	5.3167e-05	0.000738992
ASCL1	62.1148	-5.5458	1.37235	-4.0411	5.32016e-05	0.000738992
CDK2AP1	278.643	1.8351	0.454162	4.04063	5.33081e-05	0.000739938
ZNF483	348.857	1.596	0.395344	4.037	5.41381e-05	0.000750917
CFAP43	54.499	-2.7643	0.684978	-4.03561	5.44615e-05	0.00075486
WDR60	329.78	-1.41619	0.351147	-4.03304	5.50595e-05	0.0007626
BMPR1B	616.59	-1.78373	0.442304	-4.03282	5.51116e-05	0.000762773
ZNF584	138.01	-1.18844	0.294822	-4.03105	5.55279e-05	0.000767983
TNRC18	320.491	-1.83815	0.456228	-4.02901	5.60118e-05	0.00077412
PDE8B	452.505	-2.06689	0.513144	-4.02789	5.62799e-05	0.000777267
IL11RA	46.0985	-2.11652	0.525638	-4.02658	5.65946e-05	0.000780506
BEAN1	31.2105	-3.2919	0.817543	-4.02657	5.65954e-05	0.000780506
NACC1	389.85	1.46609	0.364232	4.02515	5.6939e-05	0.000784683
KCNIP2	55.7947	-2.34089	0.581775	-4.0237	5.7291e-05	0.00078897
PEX6	64.2901	-1.45025	0.360454	-4.0234	5.73633e-05	0.000789402
EMB	282.345	1.28489	0.319399	4.02284	5.75012e-05	0.000790734
NIPAL1	23.8343	3.28399	0.816558	4.02175	5.77671e-05	0.000793824
LRRC27	57.1629	-2.16178	0.537615	-4.02106	5.79371e-05	0.000795592
CLU	617.555	-1.78688	0.444401	-4.02088	5.79815e-05	0.000795635
CASC17	19.5944	3.76616	0.936739	4.0205	5.80743e-05	0.000795824
LINC02520	21.85	-2.96112	0.736508	-4.02049	5.80779e-05	0.000795824
KIF13A	549.096	1.23903	0.308212	4.02006	5.81836e-05	0.000796631
ARRDC3	370.35	-2.01038	0.500106	-4.01991	5.82214e-05	0.000796631
LOC107986215	386.904	2.17223	0.54039	4.01975	5.82608e-05	0.000796631
CKMT1B	37.6222	2.11074	0.525299	4.01816	5.86542e-05	0.0008012
DET1	160.53	-1.63282	0.40637	-4.01806	5.86782e-05	0.0008012
MGAT5B	136.747	-1.92209	0.478624	-4.01585	5.92307e-05	0.000808172
LYPLAL1-AS1	59.9252	-3.61795	0.901099	-4.01504	5.94369e-05	0.000810412
LOC105376874	17.8879	-6.08014	1.5146	-4.01435	5.96086e-05	0.000812178
ODF2	229.983	-1.20078	0.299235	-4.01283	5.99951e-05	0.000816341
ANKRD18B	145.859	-1.61839	0.403305	-4.01282	5.99989e-05	0.000816341
WWC2	801.253	1.23511	0.307872	4.01175	6.02695e-05	0.000819444
LOC105376041	56.4467	-3.85502	0.961706	-4.00852	6.11007e-05	0.00083016
ZNF439	117.607	-1.99619	0.4981	-4.00761	6.13351e-05	0.000832757
LOC100130987	73.8689	-2.09071	0.522027	-4.00499	6.20214e-05	0.000841482
RUSC2	367.921	-1.37113	0.342396	-4.00452	6.21434e-05	0.000842017
B3GALT1	1493.91	1.97798	0.493938	4.0045	6.21483e-05	0.000842017
LRRC2	22.3962	4.7043	1.17499	4.0037	6.23588e-05	0.000844275
LOC105369489	11.6936	-5.77097	1.44147	-4.00352	6.24076e-05	0.000844343
DIO3	35.399	-5.3868	1.34615	-4.00165	6.29031e-05	0.000850032
PDCD4	173.829	-1.56137	0.390187	-4.0016	6.29163e-05	0.000850032
BACE1	530.294	-1.11313	0.278193	-4.00128	6.30019e-05	0.000850592
SYT2	146.561	1.55803	0.389422	4.00088	6.31078e-05	0.000851425
MMAB	149.464	-1.14066	0.285179	-3.99981	6.33932e-05	0.000854618
MDM1	106.309	-1.39054	0.347665	-3.99966	6.34332e-05	0.000854618
MEX3C	404.79	1.43477	0.358758	3.99927	6.35394e-05	0.000855183
KLF6	166.166	1.60024	0.400144	3.99917	6.35639e-05	0.000855183
PCED1A	161.122	-1.67286	0.41838	-3.99843	6.37647e-05	0.000857286
SLITRK6	18.953	-5.9399	1.4857	-3.99805	6.38676e-05	0.000857659
EMSLR	30.2343	2.91972	0.730296	3.99799	6.38815e-05	0.000857659
TMEM47	362.718	-1.42198	0.355722	-3.99743	6.40336e-05	0.000859103
F2	24.6046	-2.58906	0.647897	-3.9961	6.43942e-05	0.000863339
PROX1-AS1	90.3183	-4.38595	1.09786	-3.99498	6.46999e-05	0.000866835
CELF3	386.328	-2.1594	0.54065	-3.99408	6.49471e-05	0.000869542
TMEM26	24.8408	8.27125	2.07158	3.99272	6.53195e-05	0.000873921
BCO1	37.8722	-6.52095	1.6337	-3.99152	6.56515e-05	0.000877753
NTRK1	26.0344	-4.46996	1.12025	-3.99014	6.60351e-05	0.000882269
CUEDC1	177.679	-2.16152	0.541963	-3.98832	6.65425e-05	0.000888432
MROH8	62.2722	-1.65006	0.413805	-3.98753	6.6765e-05	0.000890785
SLCO6A1	108.576	-3.53687	0.887265	-3.98626	6.71229e-05	0.000894941
RBFOX3	191.139	1.98574	0.498636	3.98234	6.82389e-05	0.000909192
COA7	116.165	1.5509	0.389576	3.981	6.86256e-05	0.000913279
SNTB1	217.606	1.70704	0.428802	3.98095	6.86405e-05	0.000913279
NLRC3	25.3777	-2.59208	0.651279	-3.97999	6.89192e-05	0.000916354
GALNT17	1172.75	1.69098	0.42489	3.97982	6.89672e-05	0.000916359
KCNN3	93.4532	-1.55273	0.390241	-3.97891	6.92332e-05	0.000919261
NRG2	144.532	-3.12843	0.786339	-3.97847	6.93598e-05	0.000920308
LOC401021	100.177	-6.64331	1.67006	-3.97788	6.95319e-05	0.000921956
ARID3C	13.6954	-3.92454	0.986964	-3.97637	6.99739e-05	0.000927178
EXT2	469.197	-0.762716	0.191896	-3.97463	7.04896e-05	0.00093337
FAM161B	54.8454	-2.04429	0.514613	-3.97248	7.11284e-05	0.000941181
LOC105378054	18.4194	-6.54085	1.64743	-3.97033	7.17744e-05	0.000949077
LOC101929418	15.6481	-5.69136	1.43399	-3.9689	7.22038e-05	0.000954101
IGFBP2	621.352	-1.88947	0.476181	-3.96797	7.24878e-05	0.000957197
RABEPK	79.0815	1.48585	0.374568	3.96684	7.28328e-05	0.000961094
RND3	342.807	2.58234	0.651018	3.96662	7.29e-05	0.000961322
MAP1B	10085	-0.987024	0.248861	-3.96616	7.30402e-05	0.000962512
MARCHF6	1168.11	-0.968142	0.244162	-3.96516	7.33472e-05	0.000965897
ANKRD20A4-ANKRD20A20P	28.0411	-4.20466	1.06071	-3.96402	7.36972e-05	0.000969843
GKAP1	144.817	-1.34439	0.339364	-3.96149	7.44827e-05	0.000979511
TMEM196	47.6426	-5.2921	1.33635	-3.96013	7.49086e-05	0.000984417
HNF1A-AS1	10.5073	-7.58003	1.91416	-3.95997	7.49579e-05	0.000984417
PDP1	147.617	1.55121	0.391783	3.95936	7.51523e-05	0.000985952
ABHD6	75.9112	-2.29675	0.580093	-3.95928	7.51772e-05	0.000985952
ADAR	952.235	1.05625	0.266981	3.95629	7.61233e-05	0.000997681
